# Supplementary material for: Hybridization drives mitochondrial DNA degeneration and metabolic shift in a species with biparental mitochondrial inheritance
Source: bioRxiv preprint, doi:10.1101/2022.04.29.490087, version 4 (2022-10-25)
Supplement: Supplemental Table S2 [file 490087_file10.xlsx]

## Sheet: Supplemental_Table_S2
Supplemental Table S2. Summary of the sequenced MA lines
Cross	Line	Passage	Timepoint	Library file name	mtDNA haplotype	mtDNA recombination	Respiration	mtDNA deletion	mtDNA instability	Aneuploidy instability
CC1	J2	1	initial	NS.1249.002.N709---N506.J2_P1	clone	TRUE	TRUE	FALSE	FALSE	FALSE
CC1	J2	35	final	NS.1250.002.N703---N504.J2_P35	J2	TRUE	TRUE	FALSE	FALSE	FALSE
CC1	J4	1	initial	NS.1249.001.N704---N504.J4_P1	clone	TRUE	TRUE	FALSE	FALSE	FALSE
CC1	J4	35	final	NS.1250.001.N704---N508.J4_P35	J4	TRUE	TRUE	FALSE	FALSE	FALSE
CC1	J5	1	initial	NS.1249.002.N711---N517.J5_P1	clone	FALSE	TRUE	FALSE	FALSE	FALSE
CC1	J5	35	final	NS.1250.001.N712---N508.J5_P35	J5	FALSE	TRUE	FALSE	FALSE	FALSE
CC1	J6	1	initial	NS.1249.001.N701---N504.J6_P1	clone	TRUE	TRUE	FALSE	FALSE	FALSE
CC1	J6	35	final	NS.1250.002.N711---N505.J6_P35	J6	TRUE	TRUE	FALSE	FALSE	FALSE
CC1	J7	1	initial	NS.1249.001.N708---N505.J7_P1	clone	FALSE	TRUE	FALSE	FALSE	FALSE
CC1	J7	35	final	NS.1250.002.N703---N507.J7_P35	J7	FALSE	TRUE	FALSE	FALSE	FALSE
CC1	J10	1	initial	NS.1249.001.N707---N503.J10_P1	clone	FALSE	TRUE	FALSE	FALSE	FALSE
CC1	J10	35	final	NS.1250.002.N710---N507.J10_P35	J10	FALSE	TRUE	FALSE	FALSE	FALSE
CC1	J11	1	initial	NS.1249.001.N710---N507.J11_P1	clone	TRUE	TRUE	FALSE	FALSE	FALSE
CC1	J11	35	final	NS.1250.001.N706---N517.J11_P35	J11	TRUE	TRUE	FALSE	FALSE	FALSE
CC1	J13	1	initial	NS.1249.001.N712---N503.J13_P1	clone	TRUE	TRUE	FALSE	FALSE	FALSE
CC1	J13	35	final	NS.1250.002.N702---N508.J13_P35	J13	TRUE	TRUE	FALSE	FALSE	FALSE
CC1	J15	1	initial	NS.1249.001.N707---N505.J15_P1	J15	TRUE	TRUE	FALSE	FALSE	FALSE
CC1	J15	35	final	NS.1250.002.N703---N503.J15_P35	clone	TRUE	FALSE	TRUE	FALSE	FALSE
CC1	J16	1	initial	NS.1249.001.N701---N502.J16_P1	clone	FALSE	TRUE	FALSE	FALSE	FALSE
CC1	J16	35	final	NS.1250.001.N704---N506.J16_P35	J16	FALSE	TRUE	FALSE	FALSE	FALSE
CC1	J17	1	initial	NS.1249.002.N707---N502.J17_P1	clone	TRUE	TRUE	FALSE	FALSE	FALSE
CC1	J17	35	final	NS.1250.001.N703---N504.J17_P35	J17	TRUE	TRUE	FALSE	FALSE	FALSE
CC1	J18	1	initial	NS.1249.002.N705---N508.J18_P1	clone	TRUE	TRUE	FALSE	FALSE	FALSE
CC1	J18	35	final	NS.1250.001.N711---N504.J18_P35	J18	TRUE	TRUE	FALSE	FALSE	FALSE
CC1	J19	1	initial	NS.1249.002.N704---N502.J19_P1	clone	TRUE	TRUE	FALSE	FALSE	FALSE
CC1	J19	35	final	NS.1250.002.N707---N508.J19_P35	J19	TRUE	TRUE	FALSE	FALSE	FALSE
CC1	J20	1	initial	NS.1249.001.N706---N502.J20_P1	clone	TRUE	TRUE	FALSE	FALSE	FALSE
CC1	J20	35	final	NS.1250.001.N712---N503.J20_P35	J20	TRUE	TRUE	FALSE	FALSE	FALSE
CC1	J21	1	initial	NS.1249.002.N704---N507.J21_P1	clone	FALSE	TRUE	FALSE	FALSE	FALSE
CC1	J21	35	final	NS.1250.001.N703---N505.J21_P35	J21	FALSE	TRUE	FALSE	FALSE	FALSE
CC1	J22	1	initial	NS.1249.002.N702---N502.J22_P1	clone	FALSE	TRUE	FALSE	FALSE	FALSE
CC1	J22	35	final	NS.1250.001.N710---N504.J22_P35	J22	FALSE	TRUE	FALSE	FALSE	FALSE
CC1	J23	1	initial	NS.1249.002.N704---N517.J23_P1	clone	TRUE	TRUE	FALSE	FALSE	FALSE
CC1	J23	35	final	NS.1250.001.N701---N505.J23_P35	J23	TRUE	TRUE	FALSE	FALSE	FALSE
CC1	J25	1	initial	NS.1249.001.N710---N504.J25_P1	clone	FALSE	TRUE	FALSE	FALSE	FALSE
CC1	J25	35	final	NS.1250.002.N701---N505.J25_P35	J25	FALSE	TRUE	FALSE	FALSE	FALSE
CC1	J26	1	initial	NS.1249.001.N707---N507.J26_P1	J26	TRUE	TRUE	FALSE	FALSE	FALSE
CC1	J27	1	initial	NS.1249.002.N701---N504.J27_P1	clone	TRUE	TRUE	FALSE	FALSE	FALSE
CC1	J27	35	final	NS.1250.001.N708---N517.J27_P35	J27	TRUE	FALSE	FALSE	TRUE	FALSE
CC1	J29	1	initial	NS.1249.002.N701---N506.J29_P1	J29	FALSE	TRUE	FALSE	FALSE	FALSE
CC1	J29	35	final	NS.1250.001.N703---N503.J29_P35	clone	FALSE	FALSE	TRUE	FALSE	FALSE
CC1	J30	1	initial	NS.1249.002.N710---N508.J30_P1	clone	TRUE	TRUE	FALSE	FALSE	FALSE
CC1	J30	35	final	NS.1250.002.N707---N507.J30_P35	J30	TRUE	TRUE	FALSE	FALSE	FALSE
CC1	J31	1	initial	NS.1249.002.N706---N517.J31_P1	clone	TRUE	TRUE	FALSE	FALSE	FALSE
CC1	J31	35	final	NS.1250.001.N703---N507.J31_P35	J31	TRUE	TRUE	FALSE	FALSE	FALSE
CC1	J32	1	initial	NS.1249.002.N701---N517.J32_P1	clone	FALSE	TRUE	FALSE	FALSE	FALSE
CC1	J32	35	final	NS.1250.001.N708---N506.J32_P35	J32	FALSE	TRUE	FALSE	FALSE	FALSE
CC1	J33	1	initial	NS.1249.002.N701---N508.J33_P1	clone	FALSE	TRUE	FALSE	FALSE	FALSE
CC1	J33	35	final	NS.1250.002.N708---N504.J33_P35	J33	FALSE	TRUE	FALSE	FALSE	FALSE
CC1	J34	1	initial	NS.1249.002.N708---N506.J34_P1	clone	FALSE	TRUE	FALSE	FALSE	FALSE
CC1	J34	35	final	NS.1250.001.N705---N506.J34_P35	J34	FALSE	TRUE	FALSE	FALSE	TRUE
CC1	J35	1	initial	NS.1249.001.N704---N508.J35_P1	clone	TRUE	TRUE	FALSE	FALSE	FALSE
CC1	J35	35	final	NS.1250.001.N709---N503.J35_P35	J35	TRUE	TRUE	FALSE	FALSE	FALSE
CC1	J36	1	initial	NS.1249.002.N710---N502.J36_P1	clone	TRUE	TRUE	FALSE	FALSE	FALSE
CC1	J36	35	final	NS.1250.001.N709---N507.J36_P35	J36	TRUE	TRUE	FALSE	FALSE	FALSE
CC1	J37	1	initial	NS.1249.001.N709---N508.J37_P1	clone	FALSE	TRUE	FALSE	FALSE	FALSE
CC1	J37	35	final	NS.1250.002.N703---N505.J37_P35	J37	FALSE	TRUE	FALSE	FALSE	FALSE
CC1	J38	1	initial	NS.1249.002.N706---N508.J38_P1	clone	FALSE	TRUE	FALSE	FALSE	FALSE
CC1	J38	35	final	NS.1250.002.N704---N517.J38_P35	J38	FALSE	TRUE	FALSE	FALSE	FALSE
CC1	J39	1	initial	NS.1249.001.N703---N517.J39_P1	clone	FALSE	TRUE	FALSE	FALSE	FALSE
CC1	J39	35	final	NS.1250.002.N701---N517.J39_P35	J39	FALSE	TRUE	FALSE	FALSE	FALSE
CC1	J40	1	initial	NS.1249.002.N707---N517.J40_P1	clone		TRUE	FALSE	FALSE	FALSE
CC1	J40	35	final	NS.1250.001.N704---N507.J40_P35	J40		TRUE			FALSE
CC1	J43	1	initial	NS.1249.002.N711---N508.J43_P1	clone	FALSE	TRUE	FALSE	FALSE	FALSE
CC1	J43	35	final	NS.1250.002.N702---N517.J43_P35	J43	FALSE	TRUE	FALSE	FALSE	FALSE
CC1	J44	1	initial	NS.1249.001.N709---N517.J44_P1	clone	FALSE	TRUE	FALSE	FALSE	FALSE
CC1	J44	35	final	NS.1250.002.N706---N502.J44_P35	J44	FALSE	TRUE	FALSE	FALSE	FALSE
CC1	J45	1	initial	NS.1249.001.N706---N503.J45_P1	clone	TRUE	TRUE	FALSE	FALSE	FALSE
CC1	J45	35	final	NS.1250.001.N701---N508.J45_P35	J45	TRUE	TRUE	FALSE	FALSE	FALSE
CC1	J46	1	initial	NS.1249.001.N712---N502.J46_P1	clone	TRUE	TRUE	FALSE	FALSE	FALSE
CC1	J46	35	final	NS.1250.001.N711---N507.J46_P35	J46	TRUE	TRUE	FALSE	FALSE	FALSE
CC1	J47	1	initial	NS.1249.001.N701---N503.J47_P1	clone	TRUE	TRUE	FALSE	FALSE	FALSE
CC1	J47	35	final	NS.1250.002.N704---N503.J47_P35	J47	TRUE	TRUE	FALSE	FALSE	FALSE
CC1	J48	1	initial	NS.1249.001.N712---N506.J48_P1	clone	FALSE	TRUE	FALSE	FALSE	FALSE
CC1	J48	35	final	NS.1250.002.N705---N507.J48_P35	J48	FALSE		FALSE		FALSE
CC1	J51	1	initial	NS.1249.002.N706---N503.J51_P1	clone	FALSE	TRUE	FALSE	FALSE	FALSE
CC1	J51	35	final	NS.1250.002.N703---N506.J51_P35	J51	FALSE	TRUE	FALSE	FALSE	FALSE
CC1	J53	1	initial	NS.1249.001.N703---N508.J53_P1	clone	FALSE		FALSE		FALSE
CC1	J53	35	final	NS.1250.001.N705---N507.J53_P35	J53	FALSE	TRUE	FALSE	FALSE	FALSE
CC1	J54	1	initial	NS.1249.002.N703---N508.J54_P1	J54	TRUE	TRUE	FALSE	FALSE	FALSE
CC1	J54	35	final	NS.1250.001.N712---N504.J54_P35	clone	TRUE	FALSE	TRUE	FALSE	TRUE
CC1	J55	1	initial	NS.1249.001.N704---N503.J55_P1	clone	FALSE	TRUE	FALSE	FALSE	FALSE
CC1	J55	35	final	NS.1250.002.N701---N504.J55_P35	J55	FALSE	TRUE	FALSE	FALSE	FALSE
CC1	J56	1	initial	NS.1249.001.N712---N505.J56_P1	clone	FALSE	TRUE	FALSE	FALSE	FALSE
CC1	J56	35	final	NS.1250.001.N704---N517.J56_P35	J56	FALSE	TRUE	FALSE	FALSE	FALSE
CC1	J59	1	initial	NS.1249.001.N711---N507.J59_P1	clone	TRUE	TRUE	FALSE	FALSE	FALSE
CC1	J59	35	final	NS.1250.001.N710---N505.J59_P35	J59	TRUE	TRUE	FALSE	FALSE	FALSE
CC1	J60	1	initial	NS.1249.001.N711---N502.J60_P1	clone	FALSE	TRUE	FALSE	FALSE	FALSE
CC1	J60	35	final	NS.1250.002.N702---N502.J60_P35	J60	FALSE	TRUE	FALSE	FALSE	FALSE
CC1	J63	1	initial	NS.1249.002.N705---N503.J63_P1	clone	FALSE	TRUE	FALSE	FALSE	FALSE
CC1	J63	35	final	NS.1250.001.N712---N517.J63_P35	J63	FALSE	TRUE	FALSE	FALSE	FALSE
CC1	J64	1	initial	NS.1249.001.N712---N517.J64_P1	J64	TRUE	TRUE	FALSE	FALSE	FALSE
CC1	J64	35	final	NS.1250.002.N712---N502.J64_P35	clone	TRUE	FALSE	TRUE	FALSE	FALSE
CC2	K2	1	initial	NS.1249.001.N711---N506.K2_P1	clone	FALSE	TRUE	FALSE	FALSE	FALSE
CC2	K2	35	final	NS.1250.001.N705---N503.K2_P35	K2	FALSE	TRUE	FALSE	FALSE	FALSE
CC2	K3	1	initial	NS.1249.002.N703---N502.K3_P1	clone	FALSE	TRUE	FALSE	FALSE	FALSE
CC2	K3	35	final	NS.1250.002.N712---N503.K3_P35	K3	FALSE	TRUE	FALSE	FALSE	FALSE
CC2	K5	1	initial	NS.1249.002.N708---N503.K5_P1	clone	FALSE	TRUE	FALSE	FALSE	FALSE
CC2	K5	35	final	NS.1250.002.N702---N503.K5_P35	K5	FALSE	TRUE	FALSE	FALSE	FALSE
CC2	K7	1	initial	NS.1249.002.N703---N505.K7_P1	clone	TRUE	TRUE	FALSE	FALSE	FALSE
CC2	K7	35	final	NS.1250.001.N703---N508.K7_P35	K7	TRUE	TRUE	FALSE	FALSE	FALSE
CC2	K8	1	initial	NS.1249.001.N711---N508.K8_P1	K8_P1	TRUE	TRUE	FALSE	FALSE	FALSE
CC2	K8	35	final	NS.1250.002.N701---N508.K8_P35	K8_P35	FALSE	FALSE	TRUE	FALSE	FALSE
CC2	K9	1	initial	NS.1249.001.N705---N517.K9_P1	clone	FALSE	TRUE	FALSE	FALSE	FALSE
CC2	K9	35	final	NS.1250.002.N705---N517.K9_P35	K9	FALSE	TRUE	FALSE	FALSE	FALSE
CC2	K10	1	initial	NS.1249.001.N704---N506.K10_P1	clone	FALSE	TRUE	FALSE	FALSE	FALSE
CC2	K10	35	final	NS.1250.001.N706---N503.K10_P35	K10	FALSE	TRUE	FALSE	FALSE	FALSE
CC2	K11	1	initial	NS.1249.001.N708---N502.K11_P1	clone	TRUE	TRUE	FALSE	FALSE	FALSE
CC2	K11	35	final	NS.1250.001.N703---N517.K11_P35	K11	TRUE	TRUE	FALSE	FALSE	FALSE
CC2	K13	1	initial	NS.1249.002.N705---N505.K13_P1	clone	FALSE	TRUE	FALSE	FALSE	FALSE
CC2	K13	35	final	NS.1250.001.N703---N506.K13_P35	K13	FALSE	TRUE	FALSE	FALSE	FALSE
CC2	K15	1	initial	NS.1249.001.N709---N506.K15_P1	clone	FALSE	TRUE	FALSE	FALSE	FALSE
CC2	K15	35	final	NS.1250.002.N709---N504.K15_P35	K15	FALSE	TRUE	FALSE	FALSE	FALSE
CC2	K17	1	initial	NS.1249.001.N701---N505.K17_P1	clone	TRUE	TRUE	FALSE	FALSE	FALSE
CC2	K17	35	final	NS.1250.001.N709---N517.K17_P35	K17	TRUE	TRUE	FALSE	FALSE	FALSE
CC2	K18	1	initial	NS.1249.002.N701---N502.K18_P1	K18_P1	TRUE	TRUE	FALSE	FALSE	FALSE
CC2	K18	35	final	NS.1250.001.N712---N502.K18_P35	K18_P35	TRUE	FALSE	TRUE	FALSE	FALSE
CC2	K19	1	initial	NS.1249.002.N702---N508.K19_P1	clone	TRUE	TRUE	FALSE	FALSE	FALSE
CC2	K19	35	final	NS.1250.001.N710---N502.K19_P35	K19	TRUE	TRUE	FALSE	FALSE	FALSE
CC2	K20	1	initial	NS.1249.001.N707---N508.K20_P1	clone	FALSE	TRUE	FALSE	FALSE	FALSE
CC2	K20	35	final	NS.1250.001.N706---N502.K20_P35	K20	FALSE	TRUE	FALSE	FALSE	FALSE
CC2	K21	1	initial	NS.1249.001.N710---N502.K21_P1	clone	FALSE	TRUE	FALSE	FALSE	FALSE
CC2	K21	35	final	NS.1250.001.N701---N506.K21_P35	K21	FALSE	TRUE	FALSE	FALSE	FALSE
CC2	K22	1	initial	NS.1249.002.N711---N505.K22_P1	clone	FALSE	TRUE	FALSE	FALSE	FALSE
CC2	K22	35	final	NS.1250.001.N709---N506.K22_P35	K22	FALSE	TRUE	FALSE	FALSE	FALSE
CC2	K24	1	initial	NS.1249.001.N708---N504.K24_P1	clone	TRUE	TRUE	FALSE	FALSE	FALSE
CC2	K24	35	final	NS.1250.001.N708---N507.K24_P35	K24	TRUE	TRUE	FALSE	FALSE	FALSE
CC2	K25	1	initial	NS.1249.002.N701---N503.K25_P1	clone	FALSE	TRUE	FALSE	FALSE	FALSE
CC2	K25	35	final	NS.1250.002.N710---N502.K25_P35	K25	FALSE	TRUE	FALSE	FALSE	FALSE
CC2	K27	1	initial	NS.1249.001.N706---N505.K27_P1	clone	FALSE	TRUE	FALSE	FALSE	FALSE
CC2	K27	35	final	NS.1250.002.N707---N503.K27_P35	K27	FALSE		FALSE		TRUE
CC2	K28	1	initial	NS.1249.001.N711---N505.K28_P1	clone	FALSE	TRUE	FALSE	FALSE	FALSE
CC2	K28	35	final	NS.1250.002.N709---N503.K28_P35	K28	FALSE	TRUE	FALSE	FALSE	FALSE
CC2	K29	1	initial	NS.1249.001.N701---N508.K29_P1	clone	FALSE	TRUE	FALSE	FALSE	TRUE
CC2	K29	35	final	NS.1250.001.N708---N505.K29_P35	K29	FALSE	TRUE	FALSE	FALSE	FALSE
CC2	K30	1	initial	NS.1249.001.N712---N508.K30_P1	clone	FALSE	TRUE	FALSE	FALSE	FALSE
CC2	K30	35	final	NS.1250.002.N705---N502.K30_P35	K30	FALSE	TRUE	FALSE	FALSE	FALSE
CC2	K31	1	initial	NS.1249.002.N712---N517.K31_P1	clone	FALSE	TRUE	FALSE	FALSE	FALSE
CC2	K31	35	final	NS.1250.002.N703---N508.K31_P35	K31	FALSE	TRUE	FALSE	FALSE	FALSE
CC2	K32	1	initial	NS.1249.002.N705---N506.K32_P1	clone	TRUE	TRUE	FALSE	FALSE	FALSE
CC2	K32	35	final	NS.1250.001.N705---N505.K32_P35	K32	TRUE	TRUE	FALSE	FALSE	FALSE
CC2	K33	1	initial	NS.1249.002.N706---N505.K33_P1	clone	TRUE	TRUE	FALSE	FALSE	FALSE
CC2	K33	35	final	NS.1250.002.N712---N517.K33_P35	K33	TRUE	TRUE	FALSE	FALSE	TRUE
CC2	K36	1	initial	NS.1249.001.N709---N502.K36_P1	clone	TRUE	TRUE	FALSE	FALSE	FALSE
CC2	K36	35	final	NS.1250.001.N711---N517.K36_P35	K36	TRUE	FALSE	FALSE	TRUE	FALSE
CC2	K38	1	initial	NS.1249.001.N708---N508.K38_P1	clone	FALSE	TRUE	FALSE	FALSE	FALSE
CC2	K38	35	final	NS.1250.001.N704---N505.K38_P35	K38	FALSE	TRUE	FALSE	FALSE	FALSE
CC2	K40	1	initial	NS.1249.002.N709---N508.K40_P1	clone	TRUE	TRUE	FALSE	FALSE	FALSE
CC2	K40	35	final	NS.1250.001.N704---N504.K40_P35	K40	TRUE		FALSE		FALSE
CC2	K43	1	initial	NS.1249.001.N708---N506.K43_P1	clone	FALSE	TRUE	FALSE	FALSE	FALSE
CC2	K43	35	final	NS.1250.001.N709---N502.K43_P35	K43	FALSE	TRUE	FALSE	FALSE	FALSE
CC2	K45	1	initial	NS.1249.002.N710---N517.K45_P1	clone	TRUE	TRUE	FALSE	FALSE	FALSE
CC2	K45	35	final	NS.1250.001.N708---N508.K45_P35	K45	TRUE	TRUE	FALSE	FALSE	FALSE
CC2	K47	1	initial	NS.1249.002.N708---N517.K47_P1	clone	TRUE	TRUE	FALSE	FALSE	FALSE
CC2	K47	35	final	NS.1250.002.N711---N508.K47_P35	K47	TRUE	TRUE	FALSE	FALSE	TRUE
CC2	K48	1	initial	NS.1249.001.N705---N505.K48_P1	clone	TRUE	TRUE	FALSE	FALSE	FALSE
CC2	K48	35	final	NS.1250.002.N702---N506.K48_P35	K48	TRUE	TRUE	FALSE	FALSE	FALSE
CC2	K50	1	initial	NS.1249.001.N706---N504.K50_P1	clone	FALSE	TRUE	FALSE	FALSE	FALSE
CC2	K50	35	final	NS.1250.001.N711---N502.K50_P35	K50	FALSE	TRUE	FALSE	FALSE	FALSE
CC2	K52	1	initial	NS.1249.001.N703---N506.K52_P1	clone	FALSE	TRUE	FALSE	FALSE	FALSE
CC2	K52	35	final	NS.1250.002.N703---N517.K52_P35	K52	FALSE	TRUE	FALSE	FALSE	FALSE
CC2	K53	1	initial	NS.1249.002.N711---N507.K53_P1	clone	TRUE	TRUE	FALSE	FALSE	FALSE
CC2	K53	35	final	NS.1250.002.N707---N517.K53_P35	K53	TRUE	TRUE	FALSE	FALSE	FALSE
CC2	K54	1	initial	NS.1249.002.N709---N507.K54_P1	clone	FALSE	TRUE	FALSE	FALSE	FALSE
CC2	K54	35	final	NS.1250.002.N712---N504.K54_P35	K54	FALSE	TRUE	FALSE	FALSE	FALSE
CC2	K56	1	initial	NS.1249.001.N711---N517.K56_P1	clone	TRUE	TRUE	FALSE	FALSE	FALSE
CC2	K56	35	final	NS.1250.001.N705---N517.K56_P35	K56	TRUE	TRUE	FALSE	FALSE	FALSE
CC2	K57	1	initial	NS.1249.002.N707---N507.K57_P1	clone	TRUE	TRUE	FALSE	FALSE	FALSE
CC2	K57	35	final	NS.1250.002.N706---N517.K57_P35	K57	TRUE	TRUE	FALSE	FALSE	FALSE
CC2	K60	1	initial	NS.1249.002.N701---N505.K60_P1	K60_P1	FALSE	FALSE	TRUE	FALSE	TRUE
CC2	K60	35	final	NS.1250.001.N711---N508.K60_P35	K60_P35	TRUE	FALSE	TRUE	FALSE	FALSE
CC2	K62	1	initial	NS.1249.002.N702---N506.K62_P1	clone	FALSE	TRUE	FALSE	FALSE	FALSE
CC2	K62	35	final	NS.1250.002.N705---N506.K62_P35	K62	FALSE	TRUE	FALSE	FALSE	FALSE
CC2	K63	1	initial	NS.1249.001.N703---N503.K63_P1	clone	TRUE	TRUE	FALSE	FALSE	FALSE
CC2	K63	35	final	NS.1250.002.N708---N503.K63_P35	K63	TRUE	TRUE	FALSE	FALSE	FALSE
CC3	L3	1	initial	NS.1249.001.N702---N517.L3_P1	clone	FALSE	TRUE	FALSE	FALSE	TRUE
CC3	L3	35	final	NS.1250.001.N706---N508.L3_P35	L3	FALSE	TRUE	FALSE	FALSE	FALSE
CC3	L5	1	initial	NS.1249.001.N712---N507.L5_P1	L5	TRUE	TRUE	FALSE	FALSE	FALSE
CC3	L5	35	final	NS.1250.002.N706---N503.L5_P35	clone	TRUE	FALSE	TRUE	FALSE	FALSE
CC3	L6	1	initial	NS.1249.002.N709---N517.L6_P1	L6_P1	TRUE	TRUE	FALSE	FALSE	FALSE
CC3	L6	35	final	NS.1250.002.N709---N502.L6_P35	L6_P35	TRUE	TRUE	FALSE	FALSE	FALSE
CC3	L8	1	initial	NS.1249.001.N706---N508.L8_P1	clone	FALSE	TRUE	FALSE	FALSE	FALSE
CC3	L8	35	final	NS.1250.001.N710---N503.L8_P35	L8	FALSE	TRUE	FALSE	FALSE	FALSE
CC3	L9	1	initial	NS.1249.001.N701---N507.L9_P1	clone	TRUE	TRUE	FALSE	FALSE	FALSE
CC3	L9	35	final	NS.1250.001.N702---N506.L9_P35	L9	TRUE	TRUE	FALSE	FALSE	FALSE
CC3	L10	1	initial	NS.1249.002.N705---N502.L10_P1	clone	TRUE	TRUE	FALSE	FALSE	FALSE
CC3	L10	35	final	NS.1250.001.N707---N508.L10_P35	L10	TRUE	TRUE	FALSE	FALSE	FALSE
CC3	L11	1	initial	NS.1249.001.N706---N507.L11_P1	clone	TRUE	TRUE	FALSE	FALSE	FALSE
CC3	L11	35	final	NS.1250.002.N704---N502.L11_P35	L11	TRUE	TRUE	FALSE	FALSE	FALSE
CC3	L12	1	initial	NS.1249.002.N710---N503.L12_P1	clone	TRUE	TRUE	FALSE	FALSE	FALSE
CC3	L12	35	final	NS.1250.001.N707---N507.L12_P35	L12	TRUE	TRUE	FALSE	FALSE	FALSE
CC3	L15	1	initial	NS.1249.001.N707---N504.L15_P1	clone	TRUE	TRUE	FALSE	FALSE	FALSE
CC3	L15	35	final	NS.1250.002.N708---N507.L15_P35	L15	TRUE	TRUE	FALSE	FALSE	FALSE
CC3	L16	1	initial	NS.1249.002.N710---N506.L16_P1	clone	FALSE	TRUE	FALSE	FALSE	FALSE
CC3	L16	35	final	NS.1250.001.N704---N503.L16_P35	L16	FALSE	TRUE	FALSE	FALSE	FALSE
CC3	L17	1	initial	NS.1249.001.N705---N506.L17_P1	clone	FALSE	TRUE	FALSE	FALSE	TRUE
CC3	L17	35	final	NS.1250.002.N702---N505.L17_P35	L17	FALSE	TRUE	FALSE	FALSE	FALSE
CC3	L19	1	initial	NS.1249.001.N710---N508.L19_P1	clone	FALSE	TRUE	FALSE	FALSE	FALSE
CC3	L19	35	final	NS.1250.001.N702---N503.L19_P35	L19	FALSE	TRUE	FALSE	FALSE	FALSE
CC3	L20	1	initial	NS.1249.001.N702---N505.L20_P1	clone	FALSE	TRUE	FALSE	FALSE	FALSE
CC3	L20	35	final	NS.1250.002.N707---N502.L20_P35	L20	FALSE	TRUE	FALSE	FALSE	FALSE
CC3	L21	1	initial	NS.1249.001.N704---N507.L21_P1	clone	TRUE	TRUE	FALSE	FALSE	FALSE
CC3	L21	35	final	NS.1250.002.N702---N507.L21_P35	L21	TRUE	TRUE	FALSE	FALSE	FALSE
CC3	L22	1	initial	NS.1249.001.N710---N517.L22_P1	clone	FALSE	TRUE	FALSE	FALSE	FALSE
CC3	L22	35	final	NS.1250.001.N705---N502.L22_P35	L22	FALSE	TRUE	FALSE	FALSE	FALSE
CC3	L25	1	initial	NS.1249.002.N705---N517.L25_P1	clone	FALSE	TRUE	FALSE	FALSE	FALSE
CC3	L25	35	final	NS.1250.002.N701---N507.L25_P35	L25	FALSE	TRUE	FALSE	FALSE	FALSE
CC3	L26	1	initial	NS.1249.001.N711---N503.L26_P1	clone	FALSE	TRUE	FALSE	FALSE	FALSE
CC3	L26	35	final	NS.1250.002.N702---N504.L26_P35	L26	FALSE	TRUE	FALSE	FALSE	FALSE
CC3	L28	1	initial	NS.1249.002.N706---N504.L28_P1	clone	FALSE	TRUE	TRUE	TRUE	FALSE
CC3	L28	35	final	NS.1250.001.N708---N502.L28_P35	L28	FALSE	TRUE	FALSE	FALSE	FALSE
CC3	L29	1	initial	NS.1249.001.N709---N505.L29_P1	clone	FALSE	TRUE	FALSE	FALSE	FALSE
CC3	L29	35	final	NS.1250.002.N706---N506.L29_P35	L29	FALSE	TRUE	FALSE	FALSE	FALSE
CC3	L34	1	initial	NS.1249.001.N702---N504.L34_P1	clone	TRUE	TRUE	FALSE	FALSE	FALSE
CC3	L34	35	final	NS.1250.001.N707---N517.L34_P35	L34	TRUE	TRUE	FALSE	FALSE	FALSE
CC3	L36	1	initial	NS.1249.002.N711---N503.L36_P1	clone	FALSE	TRUE	FALSE	FALSE	FALSE
CC3	L36	35	final	NS.1250.002.N710---N508.L36_P35	L36	FALSE	TRUE	FALSE	FALSE	FALSE
CC3	L37	1	initial	NS.1249.001.N702---N503.L37_P1	clone	TRUE	TRUE	FALSE	FALSE	FALSE
CC3	L37	35	final	NS.1250.002.N704---N508.L37_P35	L37	TRUE	TRUE	FALSE	FALSE	FALSE
CC3	L38	1	initial	NS.1249.002.N712---N502.L38_P1	clone	FALSE	TRUE	FALSE	FALSE	FALSE
CC3	L38	35	final	NS.1250.001.N707---N502.L38_P35	L38	FALSE	TRUE	FALSE	FALSE	FALSE
CC3	L39	1	initial	NS.1249.001.N702---N507.L39_P1	clone	TRUE	TRUE	FALSE	FALSE	FALSE
CC3	L39	35	final	NS.1250.001.N710---N507.L39_P35	L39	TRUE	TRUE	FALSE	FALSE	FALSE
CC3	L40	1	initial	NS.1249.001.N704---N502.L40_P1	clone	TRUE	TRUE	FALSE	FALSE	FALSE
CC3	L40	35	final	NS.1250.002.N705---N503.L40_P35	L40	TRUE	TRUE	FALSE	FALSE	FALSE
CC3	L41	1	initial	NS.1249.002.N711---N506.L41_P1	clone	FALSE	TRUE	FALSE	FALSE	FALSE
CC3	L41	35	final	NS.1250.001.N702---N502.L41_P35	L41	FALSE	TRUE	FALSE	FALSE	FALSE
CC3	L43	1	initial	NS.1249.001.N712---N504.L43_P1	clone	FALSE	TRUE	FALSE	FALSE	FALSE
CC3	L43	35	final	NS.1250.001.N712---N507.L43_P35	L43	FALSE	TRUE	FALSE	FALSE	FALSE
CC3	L44	1	initial	NS.1249.002.N709---N503.L44_P1	clone	TRUE	TRUE	FALSE	FALSE	FALSE
CC3	L44	35	final	NS.1250.001.N709---N505.L44_P35	L44	TRUE	TRUE	FALSE	FALSE	TRUE
CC3	L45	1	initial	NS.1249.002.N708---N504.L45_P1	clone	TRUE	TRUE	FALSE	FALSE	FALSE
CC3	L45	35	final	NS.1250.001.N708---N503.L45_P35	L45	TRUE	TRUE	FALSE	FALSE	FALSE
CC3	L46	1	initial	NS.1249.002.N705---N504.L46_P1	L46	FALSE	TRUE	FALSE	FALSE	FALSE
CC3	L46	35	final	NS.1250.002.N711---N517.L46_P35	clone	FALSE	FALSE	TRUE	FALSE	FALSE
CC3	L48	1	initial	NS.1249.002.N711---N504.L48_P1	clone	TRUE	TRUE	FALSE	FALSE	FALSE
CC3	L48	35	final	NS.1250.002.N708---N502.L48_P35	L48	TRUE	TRUE	FALSE	FALSE	FALSE
CC3	L49	1	initial	NS.1249.002.N707---N504.L49_P1	clone	TRUE	TRUE	FALSE	FALSE	FALSE
CC3	L49	35	final	NS.1250.001.N704---N502.L49_P35	L49	TRUE	TRUE	FALSE	FALSE	FALSE
CC3	L50	1	initial	NS.1249.002.N708---N508.L50_P1	clone	FALSE	TRUE	FALSE	FALSE	FALSE
CC3	L50	35	final	NS.1250.001.N706---N507.L50_P35	L50	FALSE	TRUE	FALSE	FALSE	FALSE
CC3	L52	1	initial	NS.1249.001.N702---N508.L52_P1	clone	FALSE	TRUE	FALSE	FALSE	FALSE
CC3	L52	35	final	NS.1250.002.N711---N506.L52_P35	L52	FALSE	TRUE	FALSE	FALSE	FALSE
CC3	L53	1	initial	NS.1249.002.N706---N506.L53_P1	clone	FALSE	TRUE	FALSE	FALSE	FALSE
CC3	L53	35	final	NS.1250.001.N702---N507.L53_P35	L53	FALSE	TRUE	FALSE	FALSE	FALSE
CC3	L54	1	initial	NS.1249.002.N707---N503.L54_P1	clone	FALSE	TRUE	FALSE	FALSE	FALSE
CC3	L54	35	final	NS.1250.002.N701---N503.L54_P35	L54	FALSE	TRUE	FALSE	FALSE	FALSE
CC3	L55	1	initial	NS.1249.001.N710---N506.L55_P1	clone	TRUE	TRUE	FALSE	FALSE	FALSE
CC3	L55	35	final	NS.1250.002.N709---N517.L55_P35	L55	TRUE	TRUE	FALSE	FALSE	FALSE
CC3	L56	1	initial	NS.1249.002.N704---N503.L56_P1	clone	TRUE	TRUE	FALSE	FALSE	FALSE
CC3	L56	35	final	NS.1250.001.N712---N505.L56_P35	L56	TRUE	TRUE	FALSE	FALSE	FALSE
CC3	L57	1	initial	NS.1249.001.N709---N504.L57_P1	clone	TRUE	TRUE	FALSE	FALSE	FALSE
CC3	L57	35	final	NS.1250.002.N709---N507.L57_P35	L57	TRUE		FALSE		FALSE
CC3	L58	1	initial	NS.1249.002.N710---N505.L58_P1	clone	FALSE	TRUE	FALSE	FALSE	FALSE
CC3	L58	35	final	NS.1250.002.N708---N505.L58_P35	L58	FALSE	TRUE	FALSE	FALSE	FALSE
CC3	L61	1	initial	NS.1249.001.N708---N507.L61_P1	L61_P1	FALSE	TRUE	FALSE	FALSE	FALSE
CC3	L61	35	final	NS.1250.001.N710---N517.L61_P35	L61_P35	FALSE	TRUE	FALSE	FALSE	FALSE
CC3	L62	1	initial	NS.1249.001.N701---N517.L62_P1	clone	FALSE	TRUE	FALSE	FALSE	FALSE
CC3	L62	35	final	NS.1250.002.N710---N505.L62_P35	L62	FALSE	TRUE	FALSE	FALSE	FALSE
CC3	L63	1	initial	NS.1249.001.N710---N505.L63_P1	clone	TRUE	TRUE	FALSE	FALSE	FALSE
CC3	L63	35	final	NS.1250.001.N708---N504.L63_P35	L63	TRUE	TRUE	FALSE	FALSE	FALSE
CC3	L64	1	initial	NS.1249.001.N711---N504.L64_P1	clone	FALSE	TRUE	FALSE	FALSE	FALSE
CC3	L64	35	final	NS.1250.001.N707---N503.L64_P35	L64	FALSE	TRUE	FALSE	FALSE	FALSE
BB1	I1	1	initial	HI.4802.002.N703---N517.I1_P1	clone	TRUE	TRUE	FALSE	FALSE	FALSE
BB1	I1	35	final	HI.4803.001.N708---N508.I1_P35	I1	TRUE	TRUE	FALSE	FALSE	FALSE
BB1	I2	1	initial	HI.4802.003.N706---N504.I2_P1	clone	FALSE	TRUE	FALSE	FALSE	FALSE
BB1	I2	35	final	HI.4803.002.N707---N506.I2_P35	I2	FALSE	TRUE	FALSE	FALSE	FALSE
BB1	I3	1	initial	HI.4802.003.N701---N503.I3_P1	clone	FALSE	TRUE	FALSE	FALSE	FALSE
BB1	I3	35	final	HI.4803.003.N704---N503.I3_P35	I3	FALSE	TRUE	FALSE	FALSE	FALSE
BB1	I4	1	initial	HI.4802.003.N709---N505.I4_P1	clone	TRUE	TRUE	FALSE	FALSE	FALSE
BB1	I4	35	final	HI.4803.003.N705---N507.I4_P35	I4	TRUE	TRUE	FALSE	FALSE	FALSE
BB1	I5	1	initial	HI.4802.002.N707---N517.I5_P1	clone	FALSE	TRUE	FALSE	FALSE	FALSE
BB1	I5	35	final	HI.4803.001.N702---N508.I5_P35	I5	FALSE	TRUE	FALSE	FALSE	FALSE
BB1	I6	1	initial	HI.4802.002.N701---N503.I6_P1	clone	FALSE	TRUE	FALSE	FALSE	FALSE
BB1	I6	35	final	HI.4803.003.N704---N502.I6_P35	I6	FALSE	TRUE	FALSE	FALSE	FALSE
BB1	I7	1	initial	HI.4802.003.N711---N503.I7_P1	clone	FALSE	TRUE			FALSE
BB1	I7	35	final	HI.4803.003.N708---N508.I7_P35	I7	FALSE	TRUE	FALSE	FALSE	FALSE
BB1	I8	1	initial	HI.4802.002.N711---N508.I8_P1	clone	TRUE	TRUE	FALSE	FALSE	FALSE
BB1	I8	35	final	HI.4803.002.N710---N517.I8_P35	I8	TRUE	TRUE	FALSE	FALSE	TRUE
BB1	I11	1	initial	HI.4802.003.N706---N507.I11_P1	clone	TRUE	TRUE	FALSE	FALSE	FALSE
BB1	I11	35	final	HI.4803.001.N706---N504.I11_P35	I11	TRUE	TRUE	FALSE	FALSE	FALSE
BB1	I12	1	initial	HI.4802.002.N702---N504.I12_P1	clone	TRUE	TRUE	FALSE	FALSE	FALSE
BB1	I12	35	final	HI.4803.001.N706---N505.I12_P35	I12	TRUE	TRUE	FALSE	FALSE	FALSE
BB1	I14	1	initial	HI.4802.002.N709---N507.I14_P1	clone	TRUE	TRUE	FALSE	FALSE	FALSE
BB1	I14	35	final	HI.4803.001.N709---N507.I14_P35	I14	TRUE	TRUE	FALSE	FALSE	FALSE
BB1	I15	1	initial	HI.4802.002.N702---N502.I15_P1	clone	FALSE	TRUE	FALSE	FALSE	TRUE
BB1	I15	35	final	HI.4803.002.N704---N503.I15_P35	I15	FALSE	TRUE	FALSE	FALSE	FALSE
BB1	I16	1	initial	HI.4802.003.N702---N505.I16_P1	clone	FALSE	TRUE	FALSE	FALSE	FALSE
BB1	I16	35	final	HI.4803.003.N708---N502.I16_P35	I16	FALSE	TRUE	FALSE	FALSE	FALSE
BB1	I18	1	initial	HI.4802.003.N703---N508.I18_P1	clone	TRUE	TRUE	FALSE	FALSE	FALSE
BB1	I18	35	final	HI.4803.003.N708---N504.I18_P35	I18	TRUE	TRUE	FALSE	FALSE	FALSE
BB1	I19	1	initial	HI.4802.002.N712---N502.I19_P1	clone	TRUE	TRUE	FALSE	FALSE	FALSE
BB1	I19	35	final	HI.4803.002.N710---N505.I19_P35	I19	TRUE	TRUE	FALSE	FALSE	FALSE
BB1	I21	1	initial	HI.4802.001.N702---N507.I21_P1	clone	TRUE	TRUE	FALSE	FALSE	FALSE
BB1	I21	35	final	HI.4803.001.N704---N503.I21_P35	I21	TRUE	TRUE	FALSE	FALSE	FALSE
BB1	I22	1	initial	HI.4802.001.N710---N504.I22_P1	clone	FALSE	TRUE	FALSE	FALSE	FALSE
BB1	I22	35	final	HI.4803.003.N710---N507.I22_P35	I22	FALSE	TRUE	FALSE	FALSE	FALSE
BB1	I23	1	initial	HI.4802.001.N710---N508.I23_P1	clone	TRUE	TRUE	FALSE	FALSE	FALSE
BB1	I23	35	final	HI.4803.002.N707---N505.I23_P35	I23	TRUE	TRUE	FALSE	FALSE	FALSE
BB1	I24	1	initial	NS.1249.002.N701---N507.I24_P1	clone	TRUE	TRUE	FALSE	FALSE
BB1	I24	35	final	NS.1250.001.N706---N506.I24_P35	I24	TRUE	TRUE	FALSE	FALSE
BB1	I26	1	initial	HI.4802.001.N704---N506.I26_P1	clone	TRUE	TRUE	FALSE	FALSE	FALSE
BB1	I26	35	final	HI.4803.001.N710---N502.I26_P35	I26	TRUE	TRUE	FALSE	FALSE	FALSE
BB1	I27	1	initial	NS.1249.002.N702---N517.I27_P1	clone	TRUE	TRUE	FALSE	FALSE
BB1	I27	35	final	NS.1250.001.N701---N504.I27_P35	I27	TRUE	TRUE	FALSE	FALSE
BB1	I28	1	initial	HI.4802.001.N704---N507.I28_P1	clone	FALSE	TRUE	FALSE	FALSE	FALSE
BB1	I28	35	final	HI.4803.002.N710---N506.I28_P35	I28	FALSE	TRUE	FALSE	FALSE	FALSE
BB1	I29	1	initial	HI.4802.001.N701---N506.I29_P1	clone	TRUE	TRUE	FALSE	FALSE	TRUE
BB1	I29	35	final	HI.4803.001.N703---N517.I29_P35	I29	TRUE	TRUE	FALSE	FALSE	FALSE
BB1	I31	1	initial	HI.4802.002.N704---N505.I31_P1	clone	TRUE	TRUE	FALSE	FALSE	FALSE
BB1	I31	35	final	HI.4803.001.N707---N502.I31_P35	I31	TRUE	TRUE	FALSE	FALSE	FALSE
BB1	I33	1	initial	HI.4802.003.N709---N507.I33_P1	clone	TRUE	TRUE	FALSE	FALSE	FALSE
BB1	I33	35	final	HI.4803.001.N711---N506.I33_P35	I33	TRUE	TRUE	FALSE	FALSE	FALSE
BB1	I35	1	initial	HI.4802.002.N706---N517.I35_P1	clone	TRUE	TRUE	FALSE	FALSE	FALSE
BB1	I35	35	final	HI.4803.001.N709---N502.I35_P35	I35	TRUE	TRUE	FALSE	FALSE	FALSE
BB1	I36	1	initial	HI.4802.003.N707---N505.I36_P1	clone	FALSE	TRUE	FALSE	FALSE	FALSE
BB1	I36	35	final	HI.4803.003.N707---N517.I36_P35	I36	FALSE	TRUE	FALSE	FALSE	FALSE
BB1	I37	1	initial	HI.4802.002.N704---N508.I37_P1	clone	TRUE	TRUE	FALSE	FALSE	FALSE
BB1	I37	35	final	HI.4803.003.N709---N517.I37_P35	I37	TRUE	TRUE	FALSE	FALSE	FALSE
BB1	I38	1	initial	HI.4802.001.N701---N503.I38_P1	clone	TRUE	TRUE	FALSE	FALSE	FALSE
BB1	I38	35	final	HI.4803.002.N701---N504.I38_P35	I38	TRUE	TRUE	FALSE	FALSE	FALSE
BB1	I40	1	initial	HI.4802.002.N703---N503.I40_P1	clone	TRUE	TRUE	FALSE	FALSE	FALSE
BB1	I40	35	final	HI.4803.002.N707---N517.I40_P35	I40	TRUE	TRUE	FALSE	FALSE	FALSE
BB1	I42	1	initial	HI.4802.002.N707---N507.I42_P1	clone	FALSE	TRUE	FALSE	FALSE	FALSE
BB1	I42	35	final	HI.4803.002.N710---N502.I42_P35	I42	FALSE	TRUE	FALSE	FALSE	FALSE
BB1	I43	1	initial	HI.4802.002.N709---N508.I43_P1	clone	FALSE	TRUE	FALSE	FALSE	TRUE
BB1	I43	35	final	HI.4803.003.N701---N508.I43_P35	I43	FALSE	TRUE	FALSE	FALSE	FALSE
BB1	I45	1	initial	HI.4802.001.N712---N508.I45_P1	clone	FALSE	TRUE	FALSE	FALSE	FALSE
BB1	I45	35	final	HI.4803.002.N711---N506.I45_P35	I45	FALSE	TRUE	FALSE	FALSE	FALSE
BB1	I46	1	initial	HI.4802.001.N705---N502.I46_P1	clone	FALSE	TRUE	FALSE	FALSE	FALSE
BB1	I46	35	final	HI.4803.001.N703---N508.I46_P35	I46	FALSE	TRUE	FALSE	FALSE	FALSE
BB1	I47	1	initial	HI.4802.003.N703---N507.I47_P1	clone	TRUE	TRUE	FALSE	FALSE	FALSE
BB1	I47	35	final	HI.4803.001.N709---N503.I47_P35	I47	TRUE	TRUE	FALSE	FALSE	FALSE
BB1	I48	1	initial	HI.4802.001.N703---N502.I48_P1	clone	FALSE	TRUE	FALSE	FALSE	FALSE
BB1	I48	35	final	HI.4803.003.N710---N504.I48_P35	I48	FALSE	TRUE	FALSE	FALSE	FALSE
BB2	H1	1	initial	HI.4802.001.N701---N517.H1_P1	clone	FALSE	TRUE	FALSE	FALSE	FALSE
BB2	H1	35	final	HI.4803.001.N707---N505.H1_P35	H1	FALSE	TRUE	FALSE	FALSE	FALSE
BB2	H2	1	initial	HI.4802.003.N708---N505.H2_P1	clone	FALSE	TRUE	FALSE	FALSE	FALSE
BB2	H2	35	final	HI.4803.003.N704---N507.H2_P35	H2	FALSE	TRUE	FALSE	FALSE	FALSE
BB2	H3	1	initial	HI.4802.003.N701---N504.H3_P1	clone	TRUE	TRUE	FALSE	FALSE	FALSE
BB2	H3	35	final	HI.4803.002.N712---N503.H3_P35	H3	TRUE	TRUE	FALSE	FALSE	TRUE
BB2	H6	1	initial	HI.4802.003.N704---N504.H6_P1	clone	TRUE	TRUE	FALSE	FALSE	FALSE
BB2	H6	35	final	HI.4803.002.N705---N506.H6_P35	H6	TRUE	TRUE	FALSE	FALSE	FALSE
BB2	H8	1	initial	HI.4802.002.N712---N504.H8_P1	clone	FALSE	TRUE	FALSE	FALSE	FALSE
BB2	H8	35	final	HI.4803.003.N711---N506.H8_P35	H8	FALSE	TRUE	FALSE	FALSE	FALSE
BB2	H9	1	initial	HI.4802.001.N703---N505.H9_P1	clone	TRUE	TRUE	FALSE	FALSE	FALSE
BB2	H9	35	final	HI.4803.001.N701---N507.H9_P35	H9	TRUE	TRUE	FALSE	FALSE	FALSE
BB2	H11	1	initial	HI.4802.001.N702---N505.H11_P1	clone	FALSE	TRUE	FALSE	FALSE	FALSE
BB2	H11	35	final	HI.4803.001.N710---N508.H11_P35	H11	FALSE	TRUE	FALSE	FALSE	FALSE
BB2	H12	1	initial	HI.4802.003.N710---N506.H12_P1	clone	TRUE	TRUE	FALSE	FALSE	FALSE
BB2	H12	35	final	HI.4803.003.N707---N507.H12_P35	H12	TRUE	TRUE	FALSE	FALSE	TRUE
BB2	H13	1	initial	HI.4802.002.N707---N506.H13_P1	clone	TRUE	TRUE	FALSE	FALSE	FALSE
BB2	H13	35	final	HI.4803.001.N712---N517.H13_P35	H13	TRUE	TRUE	FALSE	FALSE	FALSE
BB2	H14	1	initial	HI.4802.001.N705---N508.H14_P1	clone	FALSE	TRUE	FALSE	FALSE	FALSE
BB2	H14	35	final	HI.4803.001.N701---N502.H14_P35	H14	FALSE	TRUE	FALSE	FALSE	FALSE
BB2	H16	1	initial	HI.4802.002.N701---N507.H16_P1	clone	FALSE	TRUE	FALSE	FALSE	FALSE
BB2	H16	35	final	HI.4803.003.N707---N504.H16_P35	H16	FALSE	FALSE	FALSE	TRUE	TRUE
BB2	H17	1	initial	HI.4802.002.N706---N507.H17_P1	clone	FALSE	TRUE	FALSE	FALSE	FALSE
BB2	H17	35	final	HI.4803.001.N707---N508.H17_P35	H17	FALSE	TRUE	FALSE	FALSE	FALSE
BB2	H18	1	initial	HI.4802.001.N710---N503.H18_P1	clone	FALSE	TRUE	FALSE	FALSE	FALSE
BB2	H18	35	final	HI.4803.002.N703---N507.H18_P35	H18	FALSE	TRUE	FALSE	FALSE	TRUE
BB2	H19	1	initial	HI.4802.003.N712---N503.H19_P1	clone	FALSE	TRUE	FALSE	FALSE	TRUE
BB2	H19	35	final	HI.4803.002.N702---N507.H19_P35	H19	FALSE	TRUE	FALSE	FALSE	TRUE
BB2	H20	1	initial	HI.4802.003.N708---N517.H20_P1	clone	FALSE	TRUE	FALSE	FALSE	FALSE
BB2	H20	35	final	HI.4803.002.N702---N505.H20_P35	H20	FALSE	TRUE	FALSE	FALSE	TRUE
BB2	H21	1	initial	HI.4802.003.N703---N505.H21_P1	clone	FALSE	TRUE	FALSE	FALSE	FALSE
BB2	H21	35	final	HI.4803.001.N712---N502.H21_P35	H21	FALSE	TRUE	FALSE	FALSE	TRUE
BB2	H23	1	initial	HI.4802.003.N709---N506.H23_P1	clone	FALSE		TRUE		TRUE
BB2	H23	35	final	HI.4803.001.N706---N517.H23_P35	H23	FALSE		TRUE		FALSE
BB2	H24	1	initial	HI.4802.001.N708---N504.H24_P1	clone	FALSE	TRUE	FALSE	FALSE	FALSE
BB2	H24	35	final	HI.4803.002.N711---N502.H24_P35	H24	FALSE	TRUE	FALSE	FALSE	FALSE
BB2	H25	1	initial	HI.4802.002.N707---N508.H25_P1	clone	FALSE	TRUE	FALSE	FALSE	FALSE
BB2	H25	35	final	HI.4803.003.N707---N505.H25_P35	H25	FALSE	TRUE	FALSE	FALSE	FALSE
BB2	H26	1	initial	HI.4802.002.N712---N507.H26_P1	clone	TRUE	TRUE	FALSE	FALSE	FALSE
BB2	H26	35	final	HI.4803.001.N709---N504.H26_P35	H26	TRUE	TRUE	FALSE	FALSE	FALSE
BB2	H27	1	initial	HI.4802.001.N704---N508.H27_P1	clone	TRUE	TRUE	FALSE	FALSE	FALSE
BB2	H27	35	final	HI.4803.003.N708---N503.H27_P35	H27	TRUE	TRUE	FALSE	FALSE	FALSE
BB2	H28	1	initial	NS.1249.002.N703---N506.H28_P1	clone	FALSE	TRUE	FALSE	FALSE
BB2	H28	35	final	NS.1250.001.N707---N505.H28_P35	H28	FALSE	TRUE	FALSE	FALSE
BB2	H29	1	initial	HI.4802.002.N705---N503.H29_P1	clone	FALSE	TRUE	FALSE	FALSE	FALSE
BB2	H29	35	final	HI.4803.003.N707---N503.H29_P35	H29	FALSE	TRUE	FALSE	FALSE	FALSE
BB2	H30	1	initial	HI.4802.003.N704---N506.H30_P1	clone	FALSE	FALSE	TRUE	FALSE	FALSE
BB2	H30	35	final	HI.4803.003.N703---N517.H30_P35	H30	FALSE		TRUE		FALSE
BB2	H31	1	initial	HI.4802.003.N704---N505.H31_P1	clone	FALSE	TRUE	FALSE	FALSE	FALSE
BB2	H31	35	final	HI.4803.001.N711---N505.H31_P35	H31	FALSE	TRUE	FALSE	FALSE	FALSE
BB2	H32	1	initial	HI.4802.001.N703---N504.H32_P1	clone	FALSE	TRUE	FALSE	FALSE	FALSE
BB2	H32	35	final	HI.4803.002.N706---N508.H32_P35	H32	FALSE	TRUE	FALSE	FALSE	TRUE
BB2	H33	1	initial	HI.4802.001.N709---N517.H33_P1	clone	FALSE	TRUE	FALSE	FALSE	FALSE
BB2	H33	35	final	HI.4803.001.N711---N502.H33_P35	H33	FALSE	TRUE	FALSE	FALSE	FALSE
BB2	H37	1	initial	HI.4802.001.N711---N502.H37_P1	clone	FALSE	TRUE	FALSE	FALSE	FALSE
BB2	H37	35	final	HI.4803.003.N710---N503.H37_P35	H37	FALSE	TRUE	FALSE	FALSE	FALSE
BB2	H38	1	initial	NS.1249.001.N709---N503.H38_P1	clone	FALSE	TRUE	FALSE	FALSE
BB2	H38	35	final	NS.1250.001.N705---N508.H38_P35	H38	FALSE	TRUE	FALSE	FALSE
BB2	H40	1	initial	HI.4802.001.N710---N506.H40_P1	clone	FALSE	TRUE	FALSE	FALSE	FALSE
BB2	H40	35	final	HI.4803.003.N704---N508.H40_P35	H40	FALSE	TRUE	FALSE	FALSE	FALSE
BB2	H41	1	initial	HI.4802.002.N708---N508.H41_P1	clone	FALSE	TRUE	FALSE	FALSE	TRUE
BB2	H41	35	final	HI.4803.003.N705---N506.H41_P35	H41	FALSE	TRUE	FALSE	FALSE	FALSE
BB2	H43	1	initial	HI.4802.003.N701---N502.H43_P1	H43_P1	FALSE	TRUE	FALSE	FALSE	FALSE
BB2	H43	35	final	HI.4803.003.N709---N502.H43_P35	H43_P35	TRUE	TRUE	FALSE	FALSE	FALSE
BB2	H45	1	initial	HI.4802.002.N702---N506.H45_P1	H45_P1	TRUE	TRUE	FALSE	FALSE	FALSE
BB2	H45	35	final	HI.4803.003.N711---N502.H45_P35	H45_P35	FALSE	TRUE	FALSE	FALSE	FALSE
BB2	H46	1	initial	HI.4802.001.N707---N502.H46_P1	clone	TRUE	TRUE	FALSE	FALSE	FALSE
BB2	H46	35	final	HI.4803.002.N702---N517.H46_P35	H46	TRUE	TRUE	FALSE	FALSE	TRUE
BB2	H47	1	initial	HI.4802.002.N702---N517.H47_P1	clone	FALSE	TRUE	FALSE	FALSE	FALSE
BB2	H47	35	final	HI.4803.003.N702---N506.H47_P35	H47	FALSE	TRUE	FALSE	FALSE	FALSE
BB2	H48	1	initial	HI.4802.003.N706---N503.H48_P1	clone	TRUE	TRUE	FALSE	FALSE	FALSE
BB2	H48	35	final	HI.4803.002.N705---N504.H48_P35	H48	TRUE	TRUE	FALSE	FALSE	FALSE
BC1	A1	1	initial	NS.1249.002.N709---N502.A1_P1	clone	TRUE	TRUE	FALSE	FALSE
BC1	A1	35	final	NS.1250.002.N705---N504.A1_P35	A1	TRUE	TRUE	FALSE	FALSE
BC1	A3	1	initial	HI.4802.003.N711---N517.A3_P1	clone	TRUE	TRUE	FALSE	FALSE	FALSE
BC1	A3	35	final	HI.4803.002.N711---N505.A3_P35	A3	TRUE	TRUE	FALSE	FALSE	FALSE
BC1	A4	1	initial	NS.1249.001.N702---N506.A4_P1	A4_P1	FALSE	FALSE	TRUE	FALSE
BC1	A4	35	final	NS.1250.001.N701---N507.A4_P35	A4_P35	FALSE	FALSE	TRUE	FALSE
BC1	A6	1	initial	HI.4802.003.N703---N504.A6_P1	clone	TRUE	TRUE	FALSE	FALSE	FALSE
BC1	A6	35	final	HI.4803.001.N710---N506.A6_P35	A6	TRUE	TRUE	FALSE	FALSE	FALSE
BC1	A8	1	initial	HI.4802.002.N701---N508.A8_P1	clone	TRUE	TRUE	FALSE	FALSE	FALSE
BC1	A8	35	final	HI.4803.003.N710---N517.A8_P35	A8	TRUE	TRUE	FALSE	FALSE	FALSE
BC1	A10	1	initial	HI.4802.002.N710---N503.A10_P1	clone	TRUE	TRUE	FALSE	FALSE	FALSE
BC1	A10	35	final	HI.4803.002.N706---N517.A10_P35	A10	TRUE	TRUE	FALSE	FALSE	FALSE
BC1	A13	1	initial	NS.1249.002.N702---N507.A13_P1	clone	FALSE	TRUE	FALSE	FALSE
BC1	A13	35	final	NS.1250.002.N709---N505.A13_P35	A13	FALSE	TRUE	FALSE	FALSE
BC1	A17	1	initial	HI.4802.003.N707---N503.A17_P1	clone	FALSE	TRUE	FALSE	FALSE	FALSE
BC1	A17	35	final	HI.4803.003.N704---N517.A17_P35	A17	FALSE	TRUE	FALSE	FALSE	FALSE
BC1	A20	1	initial	HI.4802.002.N705---N506.A20_P1	clone	TRUE	TRUE	FALSE	FALSE	FALSE
BC1	A20	35	final	HI.4803.002.N708---N505.A20_P35	A20	TRUE	TRUE	FALSE	FALSE	FALSE
BC1	A22	1	initial	HI.4802.002.N711---N505.A22_P1	clone	TRUE	TRUE	FALSE	FALSE	FALSE
BC1	A22	35	final	HI.4803.003.N709---N504.A22_P35	A22	TRUE	TRUE	FALSE	FALSE	FALSE
BC1	A27	1	initial	NS.1249.002.N706---N507.A27_P1	clone	FALSE	TRUE	FALSE	FALSE
BC1	A27	35	final	NS.1250.002.N710---N506.A27_P35	A27	FALSE	TRUE	FALSE	FALSE
BC1	A30	1	initial	HI.4802.003.N705---N508.A30_P1	clone	FALSE	TRUE	FALSE	FALSE	FALSE
BC1	A30	35	final	HI.4803.003.N707---N506.A30_P35	A30	FALSE	TRUE	FALSE	FALSE	FALSE
BC1	A31	1	initial	HI.4802.001.N706---N505.A31_P1	clone	FALSE	TRUE	FALSE	FALSE	FALSE
BC1	A31	35	final	HI.4803.001.N707---N507.A31_P35	A31	FALSE		FALSE		TRUE
BC1	A32	1	initial	NS.1249.002.N707---N508.A32_P1	clone	TRUE	TRUE	FALSE	FALSE
BC1	A32	35	final	NS.1250.001.N709---N508.A32_P35	A32	TRUE	TRUE	FALSE	FALSE
BC1	A34	1	initial	HI.4802.002.N709---N503.A34_P1	clone	FALSE	TRUE	FALSE	FALSE	FALSE
BC1	A34	35	final	HI.4803.003.N710---N505.A34_P35	A34	FALSE	TRUE	FALSE	FALSE	FALSE
BC1	A37	1	initial	HI.4802.002.N705---N504.A37_P1	clone	FALSE	TRUE	FALSE	FALSE	FALSE
BC1	A37	35	final	HI.4803.001.N703---N502.A37_P35	A37	FALSE	TRUE	FALSE	FALSE	FALSE
BC1	A42	1	initial	NS.1249.001.N704---N517.A42_P1	clone	TRUE	TRUE	FALSE	FALSE
BC1	A42	35	final	NS.1250.001.N710---N508.A42_P35	A42	TRUE	TRUE	FALSE	FALSE
BC1	A45	1	initial	NS.1249.002.N706---N502.A45_P1	clone	FALSE	TRUE	FALSE	FALSE
BC1	A45	35	final	NS.1250.002.N704---N505.A45_P35	A45	FALSE	TRUE	FALSE	FALSE
BC1	A46	1	initial	NS.1249.002.N702---N503.A46_P1	clone	TRUE	TRUE	FALSE	FALSE
BC1	A46	35	final	NS.1250.002.N707---N504.A46_P35	A46	TRUE	TRUE	FALSE	FALSE
BC1	A48	1	initial	HI.4802.001.N710---N505.A48_P1	clone	TRUE	FALSE	TRUE	FALSE	FALSE
BC1	A48	35	final	HI.4803.001.N702---N507.A48_P35	A48	TRUE	FALSE	TRUE	FALSE	FALSE
BC1	A49	1	initial	NS.1249.001.N701---N506.A49_P1	clone	FALSE	TRUE	FALSE	FALSE
BC1	A49	35	final	NS.1250.001.N702---N508.A49_P35	A49	FALSE	TRUE	FALSE	FALSE
BC1	A50	1	initial	HI.4802.001.N705---N505.A50_P1	clone	TRUE	TRUE	FALSE	FALSE	FALSE
BC1	A50	35	final	HI.4803.001.N709---N506.A50_P35	A50	TRUE	TRUE	FALSE	FALSE	FALSE
BC1	A51	1	initial	HI.4802.001.N709---N508.A51_P1	clone	FALSE	TRUE	FALSE	FALSE	FALSE
BC1	A51	35	final	HI.4803.002.N705---N507.A51_P35	A51	FALSE	TRUE	FALSE	FALSE	FALSE
BC1	A55	1	initial	HI.4802.003.N702---N502.A55_P1	clone	TRUE	TRUE	FALSE	FALSE	FALSE
BC1	A55	35	final	HI.4803.003.N707---N508.A55_P35	A55	TRUE	TRUE	FALSE	FALSE	FALSE
BC1	A59	1	initial	NS.1249.002.N703---N507.A59_P1	clone	FALSE	TRUE	FALSE	FALSE
BC1	A59	35	final	NS.1250.002.N701---N506.A59_P35	A59	FALSE	TRUE	FALSE	FALSE
BC1	A61	1	initial	HI.4802.001.N703---N506.A61_P1	clone	FALSE	TRUE	FALSE	FALSE	FALSE
BC1	A61	35	final	HI.4803.003.N706---N507.A61_P35	A61	FALSE	TRUE	FALSE	FALSE	FALSE
BC1	A62	1	initial	HI.4802.002.N712---N517.A62_P1	A62	FALSE	FALSE	TRUE	FALSE	FALSE
BC1	A62	35	final	HI.4803.003.N703---N502.A62_P35	clone	FALSE	FALSE	TRUE	FALSE	FALSE
BC1	A63	1	initial	NS.1249.001.N705---N507.A63_P1	clone	FALSE	TRUE	FALSE	FALSE
BC1	A63	35	final	NS.1250.001.N707---N504.A63_P35	A63	FALSE	TRUE	FALSE	FALSE
BC1	A67	1	initial	HI.4802.003.N705---N502.A67_P1	clone	FALSE	TRUE	FALSE	FALSE	FALSE
BC1	A67	35	final	HI.4803.003.N709---N506.A67_P35	A67	FALSE	TRUE	FALSE	FALSE	FALSE
BC1	A68	1	initial	HI.4802.003.N711---N506.A68_P1	clone	TRUE	TRUE	FALSE	FALSE	FALSE
BC1	A68	35	final	HI.4803.003.N706---N505.A68_P35	A68	TRUE	TRUE	FALSE	FALSE	FALSE
BC1	A70	1	initial	HI.4802.002.N712---N503.A70_P1	clone	TRUE	TRUE	FALSE	FALSE	FALSE
BC1	A70	35	final	HI.4803.002.N703---N504.A70_P35	A70	TRUE	TRUE	FALSE	FALSE	TRUE
BC1	A73	1	initial	HI.4802.002.N708---N507.A73_P1	clone	TRUE	TRUE	FALSE	FALSE	FALSE
BC1	A73	35	final	HI.4803.002.N707---N502.A73_P35	A73	TRUE	TRUE	FALSE	FALSE	FALSE
BC1	A74	1	initial	HI.4802.001.N703---N507.A74_P1	A74_P1	FALSE	TRUE	FALSE	FALSE	FALSE
BC1	A74	35	final	HI.4803.001.N704---N505.A74_P35	A74_P35	TRUE	TRUE	FALSE	FALSE	TRUE
BC1	A75	1	initial	HI.4802.003.N705---N517.A75_P1	A75_P1	TRUE	TRUE	FALSE	FALSE	FALSE
BC1	A75	35	final	HI.4803.002.N701---N502.A75_P35	A75_P35	FALSE	FALSE	TRUE	FALSE	FALSE
BC1	A76	1	initial	HI.4802.002.N707---N505.A76_P1	A76_P1	FALSE	FALSE	TRUE	FALSE	FALSE
BC1	A76	35	final	HI.4803.003.N703---N507.A76_P35	A76_P35	FALSE	TRUE	FALSE	FALSE	FALSE
BC1	A79	1	initial	HI.4802.003.N708---N504.A79_P1	clone	FALSE	FALSE	TRUE	FALSE	FALSE
BC1	A79	35	final	HI.4803.003.N701---N503.A79_P35	A79	FALSE	FALSE	TRUE	FALSE	FALSE
BC1	A80	1	initial	HI.4802.002.N704---N503.A80_P1	clone	TRUE	TRUE	FALSE	FALSE	FALSE
BC1	A80	35	final	HI.4803.002.N704---N502.A80_P35	A80	TRUE	TRUE	FALSE	FALSE	FALSE
BC1	A81	1	initial	HI.4802.002.N711---N517.A81_P1	clone	TRUE	TRUE	FALSE	FALSE	FALSE
BC1	A81	35	final	HI.4803.002.N702---N506.A81_P35	A81	TRUE	TRUE	FALSE	FALSE	FALSE
BC1	A85	1	initial	HI.4802.003.N703---N506.A85_P1	clone	FALSE	TRUE	FALSE	FALSE	FALSE
BC1	A85	35	final	HI.4803.001.N710---N507.A85_P35	A85	FALSE	TRUE	FALSE	FALSE	FALSE
BC1	A86	1	initial	HI.4802.002.N708---N502.A86_P1	clone	TRUE	TRUE	FALSE	FALSE	FALSE
BC1	A86	35	final	HI.4803.002.N704---N505.A86_P35	A86	TRUE	TRUE	FALSE	FALSE	FALSE
BC1	A87	1	initial	HI.4802.002.N705---N502.A87_P1	clone	TRUE	TRUE	FALSE	FALSE	FALSE
BC1	A87	35	final	HI.4803.002.N706---N507.A87_P35	A87	TRUE	TRUE	FALSE	FALSE	FALSE
BC1	A88	1	initial	HI.4802.002.N711---N502.A88_P1	clone	TRUE	TRUE	FALSE	FALSE	FALSE
BC1	A88	35	final	HI.4803.002.N712---N506.A88_P35	A88	TRUE	TRUE	FALSE	FALSE	FALSE
BC1	A90	1	initial	HI.4802.001.N704---N502.A90_P1	clone	TRUE	TRUE	FALSE	FALSE	FALSE
BC1	A90	35	final	HI.4803.002.N705---N502.A90_P35	A90	TRUE	TRUE	FALSE	FALSE	FALSE
BC1	A91	1	initial	HI.4802.001.N705---N507.A91_P1	clone	TRUE	TRUE	FALSE	FALSE	FALSE
BC1	A91	35	final	HI.4803.001.N705---N506.A91_P35	A91	TRUE	TRUE	FALSE	FALSE	FALSE
BC1	A92	1	initial	NS.1249.001.N710---N503.A92_P1	clone	TRUE	TRUE	FALSE	FALSE
BC1	A92	35	final	NS.1250.001.N712---N506.A92_P35	A92	TRUE	TRUE	FALSE	FALSE
BC2	D3	1	initial	NS.1249.001.N706---N506.D3_P1	clone	FALSE	FALSE	TRUE	FALSE
BC2	D3	35	final	NS.1250.001.N702---N505.D3_P35	D3	FALSE	FALSE	TRUE	FALSE
BC2	D4	1	initial	HI.4802.001.N712---N507.D4_P1	clone	TRUE	TRUE	FALSE	FALSE	FALSE
BC2	D4	35	final	HI.4803.002.N701---N517.D4_P35	D4	TRUE	TRUE	FALSE	FALSE	FALSE
BC2	D8	1	initial	NS.1249.001.N704---N505.D8_P1	clone	FALSE	TRUE	FALSE	FALSE
BC2	D8	35	final	NS.1250.002.N709---N506.D8_P35	D8	FALSE	TRUE	FALSE	FALSE
BC2	D10	1	initial	HI.4802.002.N704---N507.D10_P1	clone	TRUE	TRUE	FALSE	FALSE	FALSE
BC2	D10	35	final	HI.4803.002.N712---N505.D10_P35	D10	TRUE	TRUE	FALSE	FALSE	TRUE
BC2	D12	1	initial	HI.4802.001.N711---N505.D12_P1	clone	FALSE	FALSE	TRUE	FALSE	FALSE
BC2	D12	35	final	HI.4803.001.N701---N517.D12_P35	D12	FALSE	FALSE	TRUE	FALSE	FALSE
BC2	D17	1	initial	HI.4802.002.N712---N505.D17_P1	clone	TRUE	TRUE	FALSE	FALSE	FALSE
BC2	D17	35	final	HI.4803.003.N703---N503.D17_P35	D17	TRUE	TRUE	FALSE	FALSE	FALSE
BC2	D21	1	initial	HI.4802.002.N703---N505.D21_P1	clone	FALSE	TRUE	FALSE	FALSE	FALSE
BC2	D21	35	final	HI.4803.003.N704---N506.D21_P35	D21	FALSE	TRUE	FALSE	FALSE	FALSE
BC2	D22	1	initial	NS.1249.001.N703---N507.D22_P1	clone	TRUE	TRUE	FALSE	FALSE
BC2	D22	7		NS.1249.002.N712---N503.D22_P7	D22	TRUE		FALSE
BC2	D23	1	initial	NS.1249.002.N707---N506.D23_P1	clone	FALSE	TRUE	FALSE	FALSE
BC2	D23	35	final	NS.1250.001.N711---N506.D23_P35	D23	FALSE	TRUE	FALSE	FALSE
BC2	D25	1	initial	HI.4802.003.N707---N504.D25_P1	clone	TRUE	TRUE	FALSE	FALSE	FALSE
BC2	D25	35	final	HI.4803.001.N703---N503.D25_P35	D25	TRUE	TRUE	FALSE	FALSE	FALSE
BC2	D28	1	initial	NS.1249.002.N709---N504.D28_P1	clone	FALSE	TRUE	FALSE	FALSE
BC2	D28	35	final	NS.1250.002.N706---N507.D28_P35	D28	FALSE	TRUE	FALSE	FALSE
BC2	D29	1	initial	HI.4802.002.N709---N517.D29_P1	clone	FALSE	TRUE	FALSE	FALSE	FALSE
BC2	D29	35	final	HI.4803.003.N705---N504.D29_P35	D29	FALSE	TRUE	FALSE	FALSE	FALSE
BC2	D36	1	initial	HI.4802.003.N710---N504.D36_P1	clone	FALSE	TRUE	FALSE	FALSE	TRUE
BC2	D36	1	initial	NS.1249.001.N708---N503.D36_P1	clone	FALSE	TRUE	FALSE	FALSE	TRUE
BC2	D36	35	final	HI.4803.002.N712---N504.D36_P35	D36	FALSE	TRUE	FALSE	FALSE	FALSE
BC2	D38	1	initial	HI.4802.003.N706---N508.D38_P1	clone	TRUE	FALSE	TRUE	FALSE	TRUE
BC2	D38	35	final	HI.4803.002.N709---N503.D38_P35	D38	TRUE	FALSE	TRUE	FALSE	TRUE
BC2	D39	1	initial	NS.1249.002.N704---N505.D39_P1	clone	FALSE	TRUE	FALSE	FALSE
BC2	D39	35	final	NS.1250.002.N708---N517.D39_P35	D39	FALSE	TRUE	FALSE	FALSE
BC2	D40	1	initial	HI.4802.002.N705---N507.D40_P1	clone	TRUE	TRUE	FALSE	FALSE	FALSE
BC2	D40	35	final	HI.4803.002.N711---N508.D40_P35	D40	TRUE	TRUE	FALSE	FALSE	FALSE
BC2	D41	1	initial	NS.1249.001.N705---N504.D41_P1	clone	FALSE	TRUE	FALSE	FALSE
BC2	D41	35	final	NS.1250.001.N710---N506.D41_P35	D41	FALSE	TRUE	FALSE	FALSE
BC2	D42	1	initial	HI.4802.002.N701---N502.D42_P1	clone	FALSE	TRUE	FALSE	FALSE	FALSE
BC2	D42	35	final	HI.4803.001.N701---N504.D42_P35	D42	FALSE	TRUE	FALSE	FALSE	FALSE
BC2	D45	1	initial	HI.4802.003.N709---N503.D45_P1	clone	FALSE	TRUE	FALSE	FALSE	FALSE
BC2	D45	35	final	HI.4803.002.N712---N502.D45_P35	D45	FALSE	TRUE	FALSE	FALSE	FALSE
BC2	D46	1	initial	HI.4802.001.N712---N505.D46_P1	clone	TRUE	FALSE	TRUE	FALSE	FALSE
BC2	D46	35	final	HI.4803.002.N704---N508.D46_P35	D46	TRUE	TRUE	FALSE	FALSE	FALSE
BC2	D49	1	initial	NS.1249.002.N709---N505.D49_P1	clone	FALSE	TRUE	FALSE	FALSE
BC2	D49	35	final	NS.1250.001.N702---N504.D49_P35	D49	FALSE	TRUE	FALSE	FALSE
BC2	D50	1	initial	NS.1249.001.N705---N508.D50_P1	clone	FALSE	TRUE	FALSE	FALSE
BC2	D50	35	final	NS.1250.002.N710---N517.D50_P35	D50	FALSE	TRUE	FALSE	FALSE
BC2	D51	1	initial	HI.4802.001.N701---N505.D51_P1	clone	TRUE	TRUE	FALSE	FALSE	FALSE
BC2	D51	35	final	HI.4803.002.N703---N502.D51_P35	D51	TRUE	TRUE	FALSE	FALSE	TRUE
BC2	D56	1	initial	NS.1249.001.N705---N502.D56_P1	clone	FALSE	TRUE	FALSE	FALSE
BC2	D56	35	final	NS.1250.002.N711---N504.D56_P35	D56	FALSE	TRUE	FALSE	FALSE
BC2	D57	1	initial	HI.4802.001.N711---N517.D57_P1	clone	FALSE	TRUE	FALSE	FALSE	FALSE
BC2	D57	35	final	HI.4803.001.N703---N505.D57_P35	D57	FALSE	TRUE	FALSE	FALSE	FALSE
BC2	D60	1	initial	HI.4802.001.N706---N507.D60_P1	clone	TRUE	TRUE	FALSE	FALSE	FALSE
BC2	D60	35	final	HI.4803.002.N712---N508.D60_P35	D60	TRUE	TRUE	FALSE	FALSE	FALSE
BC2	D61	1	initial	HI.4802.003.N702---N503.D61_P1	clone	TRUE	TRUE	FALSE	FALSE	FALSE
BC2	D61	35	final	HI.4803.001.N707---N506.D61_P35	D61	TRUE	TRUE	FALSE	FALSE	FALSE
BC2	D63	1	initial	HI.4802.002.N701---N504.D63_P1	clone	TRUE	TRUE	FALSE	FALSE	FALSE
BC2	D63	35	final	HI.4803.003.N702---N502.D63_P35	D63	TRUE	TRUE	FALSE	FALSE	FALSE
BC2	D67	1	initial	HI.4802.002.N712---N508.D67_P1	clone	FALSE	FALSE	TRUE	FALSE	TRUE
BC2	D67	35	final	HI.4803.001.N708---N507.D67_P35	D67	FALSE	FALSE	TRUE	FALSE	FALSE
BC2	D68	1	initial	HI.4802.003.N707---N517.D68_P1	clone	FALSE	TRUE	TRUE	TRUE	FALSE
BC2	D68	35	final	HI.4803.001.N701---N503.D68_P35	D68	FALSE	TRUE	FALSE	FALSE	FALSE
BC2	D70	1	initial	HI.4802.001.N705---N504.D70_P1	clone	FALSE	TRUE	FALSE	FALSE	FALSE
BC2	D70	35	final	HI.4803.001.N703---N506.D70_P35	D70	FALSE	TRUE	FALSE	FALSE	FALSE
BC2	D71	1	initial	NS.1249.002.N708---N505.D71_P1	clone	TRUE	FALSE	TRUE	FALSE
BC2	D71	35	final	NS.1250.002.N708---N508.D71_P35	D71	TRUE	FALSE	TRUE	FALSE
BC2	D72	1	initial	NS.1249.002.N703---N517.D72_P1	clone	FALSE	TRUE	FALSE	FALSE
BC2	D72	35	final	NS.1250.001.N703---N502.D72_P35	D72	FALSE	TRUE	FALSE	FALSE
BC2	D73	1	initial	HI.4802.002.N708---N517.D73_P1	clone	FALSE	TRUE	FALSE	FALSE	FALSE
BC2	D73	35	final	HI.4803.001.N701---N506.D73_P35	D73	FALSE	TRUE	FALSE	FALSE	FALSE
BC2	D75	1	initial	HI.4802.003.N704---N503.D75_P1	clone	FALSE	TRUE	FALSE	FALSE	FALSE
BC2	D75	35	final	HI.4803.002.N705---N505.D75_P35	D75	FALSE	TRUE	FALSE	FALSE	TRUE
BC2	D83	1	initial	HI.4802.003.N711---N508.D83_P1	clone	TRUE	TRUE	TRUE	TRUE	FALSE
BC2	D83	35	final	HI.4803.003.N710---N508.D83_P35	D83	TRUE	FALSE	TRUE	FALSE	FALSE
BC2	D84	1	initial	HI.4802.003.N703---N502.D84_P1	clone	TRUE	TRUE	FALSE	FALSE	FALSE
BC2	D84	35	final	HI.4803.003.N711---N504.D84_P35	D84	TRUE	TRUE	FALSE	FALSE	FALSE
BC2	D85	1	initial	HI.4802.003.N708---N508.D85_P1	D85	TRUE	TRUE	FALSE	FALSE
BC2	D86	35	final	HI.4803.002.N704---N517.D86_P35	D86	FALSE	TRUE	FALSE	FALSE	TRUE
BC2	D87	1	initial	HI.4802.001.N710---N502.D87_P1	clone	FALSE	TRUE	FALSE	FALSE	FALSE
BC2	D87	35	final	HI.4803.001.N706---N508.D87_P35	D87	FALSE	TRUE	FALSE	FALSE	FALSE
BC2	D89	1	initial	HI.4802.001.N711---N506.D89_P1	clone	TRUE	TRUE	FALSE	FALSE	FALSE
BC2	D89	35	final	HI.4803.001.N704---N502.D89_P35	D89	TRUE	TRUE	FALSE	FALSE	FALSE
BC2	D91	1	initial	HI.4802.003.N702---N506.D91_P1	clone	FALSE	TRUE	FALSE	FALSE	FALSE
BC2	D91	35	final	HI.4803.001.N709---N505.D91_P35	D91	FALSE		FALSE		FALSE
BC2	D92	1	initial	HI.4802.002.N711---N503.D92_P1	clone	TRUE	TRUE	FALSE	FALSE	FALSE
BC2	D92	35	final	HI.4802.003.N712---N508.D92_P35	D92	TRUE	TRUE	FALSE	FALSE	TRUE
BC2	D93	1	initial	HI.4802.003.N701---N506.D93_P1	clone	TRUE	TRUE	FALSE	FALSE	FALSE
BC2	D93	35	final	HI.4803.001.N703---N507.D93_P35	D93	TRUE	TRUE	FALSE	FALSE	FALSE
BC2	D94	1	initial	HI.4802.003.N710---N505.D94_P1	clone	FALSE	TRUE	FALSE	FALSE	FALSE
BC2	D94	35	final	HI.4803.001.N701---N505.D94_P35	D94	FALSE	TRUE	FALSE	FALSE	FALSE
BC2	D95	1	initial	NS.1249.002.N703---N504.D95_P1	clone	TRUE	TRUE	FALSE	FALSE
BC2	D95	35	final	NS.1250.001.N709---N504.D95_P35	D95	TRUE	TRUE	FALSE	FALSE
BA1	B1	1	initial	HI.4802.001.N707---N506.B1_P1	clone	FALSE	TRUE	FALSE	FALSE	FALSE
BA1	B1	35	final	HI.4803.001.N705---N508.B1_P35	B1	FALSE	TRUE	FALSE	FALSE	FALSE
BA1	B7	1	initial	HI.4802.002.N703---N504.B7_P1	clone	FALSE	TRUE	FALSE	FALSE	FALSE
BA1	B7	35	final	HI.4803.003.N703---N506.B7_P35	B7	FALSE	TRUE	FALSE	FALSE	FALSE
BA1	B10	1	initial	HI.4802.003.N702---N504.B10_P1	clone	FALSE	TRUE	FALSE	FALSE	FALSE
BA1	B10	35	final	HI.4803.001.N705---N502.B10_P35	B10	FALSE	TRUE	FALSE	FALSE	FALSE
BA1	B15	1	initial	HI.4802.001.N701---N508.B15_P1	clone	FALSE	TRUE	FALSE	FALSE	FALSE
BA1	B15	35	final	HI.4803.003.N708---N505.B15_P35	B15	FALSE	TRUE	FALSE	FALSE	FALSE
BA1	B18	1	initial	HI.4802.003.N702---N507.B18_P1	clone	FALSE	TRUE	FALSE	FALSE	FALSE
BA1	B18	35	final	HI.4803.003.N708---N506.B18_P35	B18	FALSE	TRUE	FALSE	FALSE	FALSE
BA1	B19	1	initial	HI.4802.001.N709---N504.B19_P1	clone	FALSE	TRUE	FALSE	FALSE	TRUE
BA1	B19	35	final	HI.4803.003.N709---N505.B19_P35	B19	FALSE	TRUE	FALSE	FALSE	FALSE
BA1	B23	1	initial	HI.4802.003.N712---N502.B23_P1	clone	FALSE	TRUE	FALSE	FALSE	FALSE
BA1	B23	35	final	HI.4803.003.N704---N504.B23_P35	B23	FALSE	TRUE	FALSE	FALSE	FALSE
BA1	B28	1	initial	HI.4802.002.N703---N502.B28_P1	clone	FALSE	TRUE	FALSE	FALSE	FALSE
BA1	B28	35	final	HI.4803.001.N701---N508.B28_P35	B28	FALSE	TRUE	FALSE	FALSE	FALSE
BA1	B29	1	initial	HI.4802.001.N709---N505.B29_P1	clone	FALSE	TRUE	FALSE	FALSE	FALSE
BA1	B29	35	final	HI.4803.003.N702---N517.B29_P35	B29	FALSE	TRUE	FALSE	FALSE	FALSE
BA1	B30	1	initial	HI.4802.001.N708---N507.B30_P1	clone	FALSE	TRUE	FALSE	FALSE	FALSE
BA1	B30	35	final	HI.4803.001.N707---N503.B30_P35	B30	FALSE	TRUE	FALSE	FALSE	FALSE
BA1	B31	1	initial	HI.4802.001.N712---N503.B31_P1	clone	FALSE	TRUE	FALSE	FALSE	FALSE
BA1	B31	35	final	HI.4803.003.N701---N505.B31_P35	B31	FALSE	TRUE	FALSE	FALSE	FALSE
BA1	B32	1	initial	NS.1249.002.N704---N506.B32_P1	clone	FALSE	TRUE	FALSE	FALSE
BA1	B32	16		NS.1249.002.N712---N507.B32_P16	clone	FALSE		FALSE
BA1	B32	22		NS.1250.001.N701---N503.B32_P22	clone	FALSE		FALSE
BA1	B32	35	final	NS.1250.002.N704---N504.B32_P35	B32	FALSE	TRUE	FALSE	FALSE
BA1	B33	1	initial	HI.4802.001.N703---N517.B33_P1	clone	FALSE	TRUE	FALSE	FALSE	FALSE
BA1	B33	35	final	HI.4803.003.N705---N502.B33_P35	B33	FALSE	TRUE	FALSE	FALSE	FALSE
BA1	B37	1	initial	HI.4802.002.N710---N507.B37_P1	clone	FALSE	TRUE	FALSE	FALSE	FALSE
BA1	B37	35	final	HI.4803.003.N709---N503.B37_P35	B37	FALSE	TRUE	FALSE	FALSE	FALSE
BA1	B40	1	initial	HI.4802.001.N708---N506.B40_P1	clone	FALSE	TRUE	FALSE	FALSE	FALSE
BA1	B40	16		NS.1249.002.N712---N508.B40_P16	B40_P16	FALSE		FALSE
BA1	B40	35	final	HI.4803.001.N708---N506.B40_P35	B40_P35_HI		TRUE			FALSE
BA1	B40	35	final	NS.1250.002.N704---N507.B40_P35	B40_P35_NS		TRUE			FALSE
BA1	B43	1	initial	NS.1249.002.N711---N502.B43_P1	clone	FALSE	TRUE	FALSE	FALSE
BA1	B43	7		NS.1250.002.N707---N506.B43_P7	B43	FALSE		FALSE
BA1	B46	1	initial	HI.4802.002.N706---N508.B46_P1	clone	FALSE	TRUE	FALSE	FALSE	FALSE
BA1	B46	35	final	HI.4803.003.N708---N507.B46_P35	B46	FALSE	TRUE	FALSE	FALSE	FALSE
BA1	B47	1	initial	HI.4802.002.N706---N505.B47_P1	B47_P1	FALSE	FALSE	TRUE	FALSE	FALSE
BA1	B47	35	final	HI.4803.002.N709---N506.B47_P35	B47_P35	FALSE	FALSE	TRUE	FALSE	FALSE
BA1	B49	1	initial	HI.4802.003.N708---N502.B49_P1	clone	FALSE	TRUE	FALSE	FALSE	FALSE
BA1	B49	16		NS.1250.001.N701---N502.B49_P16	clone	FALSE		FALSE
BA1	B49	35	final	HI.4803.003.N701---N502.B49_P35	B49	FALSE	TRUE	FALSE	FALSE	FALSE
BA1	B53	1	initial	HI.4802.002.N701---N517.B53_P1	clone	FALSE	TRUE	FALSE	FALSE	FALSE
BA1	B53	7		HI.4803.002.N705---N503.B53_P7	B53	FALSE		FALSE
BA1	B54	1	initial	HI.4802.001.N707---N507.B54_P1	B54	FALSE	TRUE	FALSE	FALSE	FALSE
BA1	B54	35	final	HI.4803.003.N703---N505.B54_P35	clone	FALSE	FALSE	TRUE	FALSE	FALSE
BA1	B55	1	initial	NS.1249.002.N710---N504.B55_P1	B55_P1	FALSE	TRUE	FALSE	FALSE
BA1	B55	10		NS.1249.002.N712---N504.B55_P10	clone	FALSE		FALSE
BA1	B55	35	final	NS.1250.002.N705---N508.B55_P35	B55_P35	FALSE	TRUE	FALSE	FALSE
BA1	B59	1	initial	NS.1249.001.N703---N505.B59_P1	B59_P1	FALSE	FALSE	TRUE	FALSE
BA1	B59	35	final	NS.1250.002.N704---N506.B59_P35	B59_P35	FALSE	TRUE	FALSE	FALSE
BA1	B61	1	initial	HI.4802.001.N707---N504.B61_P1	clone	FALSE	TRUE	FALSE	FALSE	FALSE
BA1	B61	35	final	HI.4803.002.N708---N507.B61_P35	B61	FALSE	TRUE	FALSE	FALSE	TRUE
BA1	B64	1	initial	HI.4802.001.N703---N508.B64_P1	clone	FALSE	TRUE	FALSE	FALSE	FALSE
BA1	B64	35	final	HI.4803.002.N708---N504.B64_P35	B64	FALSE	TRUE	FALSE	FALSE	TRUE
BA1	B67	1	initial	HI.4802.001.N702---N517.B67_P1	clone	FALSE		TRUE		FALSE
BA1	B67	35	final	HI.4803.001.N705---N507.B67_P35	B67	FALSE	FALSE	TRUE	FALSE	FALSE
BA1	B69	1	initial	HI.4802.001.N705---N506.B69_P1	clone	FALSE	TRUE	FALSE	FALSE	FALSE
BA1	B69	35	final	HI.4803.003.N702---N503.B69_P35	B69	FALSE	TRUE	FALSE	FALSE	FALSE
BA1	B70	1	initial	HI.4802.001.N712---N504.B70_P1	clone	FALSE	TRUE	FALSE	FALSE	FALSE
BA1	B70	35	final	HI.4803.002.N702---N502.B70_P35	B70	FALSE	TRUE	FALSE	FALSE	TRUE
BA1	B71	1	initial	HI.4802.003.N703---N517.B71_P1	clone	FALSE	TRUE	FALSE	FALSE	FALSE
BA1	B71	35	final	HI.4803.002.N704---N506.B71_P35	B71	FALSE	TRUE	FALSE	FALSE	TRUE
BA1	B72	1	initial	HI.4802.002.N702---N507.B72_P1	clone	FALSE	TRUE	FALSE	FALSE	FALSE
BA1	B72	35	final	HI.4803.001.N708---N502.B72_P35	B72	FALSE	TRUE	FALSE	FALSE	FALSE
BA1	B74	1	initial	HI.4802.003.N710---N517.B74_P1	clone	FALSE	TRUE	FALSE	FALSE	FALSE
BA1	B74	35	final	HI.4803.001.N702---N502.B74_P35	B74	FALSE	TRUE	FALSE	FALSE	FALSE
BA1	B80	1	initial	HI.4802.001.N710---N507.B80_P1	clone	FALSE	TRUE	FALSE	FALSE	FALSE
BA1	B80	35	final	HI.4803.002.N712---N507.B80_P35	B80	FALSE	TRUE	FALSE	FALSE	FALSE
BA1	B82	1	initial	HI.4802.003.N709---N504.B82_P1	clone	FALSE	TRUE	FALSE	FALSE	FALSE
BA1	B82	35	final	HI.4803.003.N705---N503.B82_P35	B82	FALSE	TRUE	FALSE	FALSE	FALSE
BA1	B85	1	initial	HI.4802.003.N709---N502.B85_P1	clone	FALSE	TRUE	FALSE	FALSE	FALSE
BA1	B85	35	final	HI.4803.002.N701---N503.B85_P35	B85	FALSE	TRUE	FALSE	FALSE	TRUE
BA1	B86	1	initial	HI.4802.002.N701---N505.B86_P1	clone	FALSE	TRUE	FALSE	FALSE	FALSE
BA1	B86	35	final	HI.4803.003.N706---N517.B86_P35	B86	FALSE	TRUE	FALSE	FALSE	FALSE
BA1	B90	1	initial	HI.4802.001.N706---N508.B90_P1	clone	FALSE	TRUE	FALSE	FALSE	FALSE
BA1	B90	35	final	HI.4803.003.N706---N502.B90_P35	B90	FALSE	TRUE	FALSE	FALSE	TRUE
BA1	B96	1	initial	HI.4802.001.N701---N507.B96_P1	clone	FALSE	TRUE	FALSE	FALSE	FALSE
BA1	B96	35	final	HI.4803.002.N701---N507.B96_P35	B96	FALSE	TRUE	FALSE	FALSE	TRUE
BA2	E3	1	initial	HI.4802.003.N710---N502.E3_P1	clone	FALSE	TRUE	FALSE	FALSE	FALSE
BA2	E3	35	final	HI.4803.001.N711---N504.E3_P35	E3	FALSE	TRUE	FALSE	FALSE	FALSE
BA2	E5	1	initial	NS.1249.002.N710---N507.E5_P1	clone	FALSE	TRUE	FALSE	FALSE
BA2	E5	35	final	NS.1250.002.N711---N502.E5_P35	E5	FALSE		FALSE
BA2	E9	1	initial	HI.4802.001.N708---N502.E9_P1	clone	FALSE	TRUE	FALSE	FALSE	FALSE
BA2	E9	35	final	HI.4802.003.N712---N507.E9_P35	E9	FALSE	TRUE	FALSE	FALSE	FALSE
BA2	E11	1	initial	HI.4802.001.N705---N503.E11_P1	clone	TRUE	FALSE	TRUE	FALSE	FALSE
BA2	E11	35	final	HI.4803.001.N706---N503.E11_P35	E11	TRUE	FALSE	TRUE	FALSE	FALSE
BA2	E12	1	initial	HI.4802.001.N709---N502.E12_P1	clone	FALSE	TRUE	FALSE	FALSE	FALSE
BA2	E12	35	final	HI.4803.003.N711---N503.E12_P35	E12	FALSE	TRUE	FALSE	FALSE	FALSE
BA2	E15	1	initial	HI.4802.001.N706---N502.E15_P1	E15_P1	TRUE	TRUE	FALSE	FALSE	FALSE
BA2	E15	35	final	HI.4803.002.N703---N517.E15_P35	E15_P35	TRUE	FALSE	TRUE	FALSE	TRUE
BA2	E19	1	initial	NS.1249.002.N703---N503.E19_P1	clone	FALSE	TRUE	FALSE	FALSE
BA2	E19	35	final	NS.1250.001.N707---N506.E19_P35	E19	FALSE	TRUE	FALSE	FALSE
BA2	E21	1	initial	HI.4802.003.N706---N505.E21_P1	E21_P1	FALSE	FALSE	FALSE	TRUE	FALSE
BA2	E21	35	final	HI.4802.003.N712---N504.E21_P35	E21_P35	TRUE	FALSE	TRUE	FALSE	TRUE
BA2	E25	1	initial	HI.4802.001.N709---N507.E25_P1	E25_P1	FALSE	FALSE	FALSE	TRUE	TRUE
BA2	E25	35	final	HI.4803.002.N706---N506.E25_P35	E25_P35	TRUE	FALSE	TRUE	FALSE	TRUE
BA2	E27	1	initial	NS.1249.001.N707---N506.E27_P1	clone	FALSE	TRUE	FALSE	FALSE
BA2	E27	35	final	NS.1250.002.N706---N508.E27_P35	E27	FALSE	TRUE	FALSE	FALSE
BA2	E30	1	initial	HI.4802.003.N707---N508.E30_P1	clone	FALSE	TRUE	FALSE	FALSE	FALSE
BA2	E30	35	final	HI.4803.003.N703---N504.E30_P35	E30	FALSE	TRUE	FALSE	FALSE	FALSE
BA2	E33	1	initial	HI.4802.001.N710---N517.E33_P1	clone	FALSE	TRUE	FALSE	FALSE	FALSE
BA2	E33	35	final	HI.4803.001.N712---N507.E33_P35	E33	FALSE	TRUE	FALSE	FALSE	FALSE
BA2	E34	1	initial	HI.4802.001.N711---N504.E34_P1	E34	FALSE	FALSE	FALSE	TRUE	TRUE
BA2	E34	35	final	HI.4803.001.N705---N505.E34_P35	clone	FALSE	FALSE	TRUE	FALSE	FALSE
BA2	E36	1	initial	HI.4802.002.N709---N505.E36_P1	clone	FALSE	TRUE	FALSE	FALSE	FALSE
BA2	E36	35	final	HI.4803.001.N710---N505.E36_P35	E36	FALSE	TRUE	FALSE	FALSE	FALSE
BA2	E37	1	initial	HI.4802.003.N705---N505.E37_P1	E37	FALSE	FALSE	FALSE	TRUE	TRUE
BA2	E37	35	final	HI.4803.002.N707---N508.E37_P35	clone	FALSE	FALSE	TRUE	FALSE	TRUE
BA2	E39	1	initial	HI.4802.002.N710---N508.E39_P1	clone	FALSE	TRUE	FALSE	FALSE	FALSE
BA2	E39	35	final	HI.4803.002.N703---N506.E39_P35	E39	FALSE	TRUE	FALSE	FALSE	TRUE
BA2	E40	1	initial	HI.4802.001.N708---N505.E40_P1	clone	TRUE	FALSE	TRUE	FALSE	FALSE
BA2	E40	35	final	HI.4803.001.N711---N503.E40_P35	E40	TRUE	FALSE	TRUE	FALSE	FALSE
BA2	E46	1	initial	NS.1249.001.N707---N502.E46_P1	clone	FALSE	TRUE	FALSE	FALSE
BA2	E46	35	final	NS.1250.001.N706---N504.E46_P35	E46	FALSE	TRUE	FALSE	FALSE
BA2	E50	1	initial	HI.4802.002.N704---N517.E50_P1	E50_P1	FALSE	TRUE	FALSE	FALSE	FALSE
BA2	E50	35	final	HI.4803.002.N706---N504.E50_P35	E50_P35	TRUE	TRUE	TRUE	TRUE	TRUE
BA2	E51	1	initial	HI.4802.001.N709---N503.E51_P1	clone	TRUE	FALSE	TRUE	FALSE	FALSE
BA2	E51	35	final	HI.4803.003.N701---N507.E51_P35	E51	TRUE	FALSE	TRUE	FALSE	FALSE
BA2	E52	1	initial	HI.4802.001.N704---N517.E52_P1	clone	FALSE	TRUE	FALSE	FALSE	FALSE
BA2	E52	35	final	HI.4803.002.N708---N517.E52_P35	E52	FALSE	TRUE	FALSE	FALSE	TRUE
BA2	E54	1	initial	HI.4802.002.N711---N504.E54_P1	clone	TRUE	FALSE	TRUE	FALSE	FALSE
BA2	E54	35	final	HI.4803.002.N702---N504.E54_P35	E54	TRUE	FALSE	TRUE	FALSE	TRUE
BA2	E57	1	initial	NS.1249.001.N708---N517.E57_P1	clone	FALSE	TRUE	FALSE	FALSE
BA2	E57	35	final	NS.1250.001.N706---N505.E57_P35	E57	FALSE	TRUE	FALSE	FALSE
BA2	E61	1	initial	HI.4802.003.N707---N502.E61_P1	E61_P1	FALSE	FALSE	FALSE	TRUE	FALSE
BA2	E61	35	final	HI.4803.002.N710---N507.E61_P35	E61_P35	TRUE	FALSE	TRUE	FALSE	TRUE
BA2	E64	1	initial	HI.4802.003.N706---N502.E64_P1	clone	FALSE	TRUE	FALSE	FALSE	FALSE
BA2	E64	35	final	HI.4803.001.N709---N517.E64_P35	E64	FALSE	TRUE	FALSE	FALSE	FALSE
BA2	E65	1	initial	HI.4802.003.N711---N505.E65_P1	E65_P1	FALSE	FALSE	FALSE	TRUE	FALSE
BA2	E65	35	final	HI.4803.003.N704---N505.E65_P35	E65_P35	TRUE	FALSE	TRUE	FALSE	FALSE
BA2	E68	1	initial	HI.4802.003.N708---N506.E68_P1	E68_P1	TRUE	TRUE	TRUE	TRUE	TRUE
BA2	E68	35	final	HI.4803.001.N702---N504.E68_P35	E68_P35	FALSE	TRUE	FALSE	FALSE	FALSE
BA2	E69	1	initial	HI.4802.003.N712---N517.E69_P1	E69_P1	FALSE	TRUE	FALSE	FALSE	FALSE
BA2	E69	35	final	HI.4803.002.N709---N504.E69_P35	E69_P35	TRUE	FALSE	TRUE	FALSE	TRUE
BA2	E70	1	initial	HI.4802.002.N710---N505.E70_P1	clone	TRUE	FALSE	TRUE	FALSE	FALSE
BA2	E70	35	final	HI.4803.001.N702---N503.E70_P35	E70	TRUE	FALSE	TRUE	FALSE	FALSE
BA2	E72	1	initial	HI.4802.003.N711---N502.E72_P1	E72_P1	TRUE	TRUE	TRUE	TRUE	TRUE
BA2	E72	35	final	HI.4803.001.N709---N508.E72_P35	E72_P35	FALSE	TRUE	FALSE	FALSE	FALSE
BA2	E78	1	initial	HI.4802.002.N710---N504.E78_P1	E78_P1	FALSE	TRUE	FALSE	FALSE	FALSE
BA2	E78	35	final	HI.4803.002.N707---N504.E78_P35	E78_P35	TRUE	TRUE	TRUE	TRUE	FALSE
BA2	E81	1	initial	HI.4802.002.N706---N502.E81_P1	clone	FALSE	FALSE	TRUE	FALSE	FALSE
BA2	E81	35	final	HI.4803.001.N702---N517.E81_P35	E81	FALSE	FALSE	TRUE	FALSE	FALSE
BA2	E84	1	initial	HI.4802.001.N702---N506.E84_P1	E84_P1	TRUE	FALSE	TRUE	FALSE	FALSE
BA2	E84	35	final	HI.4803.002.N707---N503.E84_P35	E84_P35	FALSE	FALSE	FALSE	TRUE	TRUE
BA2	E86	1	initial	HI.4802.002.N703---N506.E86_P1	clone	FALSE	TRUE	FALSE	FALSE	FALSE
BA2	E86	25		HI.4803.002.N702---N503.E86_P25	E86	FALSE		FALSE		TRUE
BA2	E88	1	initial	HI.4802.001.N704---N505.E88_P1	clone	FALSE	TRUE	FALSE	FALSE	FALSE
BA2	E88	35	final	HI.4803.002.N708---N506.E88_P35	E88	FALSE	TRUE	FALSE	FALSE	TRUE
BA2	E89	1	initial	HI.4802.001.N705---N517.E89_P1	clone	FALSE	TRUE	FALSE	FALSE	FALSE
BA2	E89	35	final	HI.4803.001.N712---N508.E89_P35	E89	FALSE	TRUE	FALSE	FALSE	FALSE
BA2	E92	1	initial	HI.4802.003.N702---N508.E92_P1	clone	FALSE	TRUE	FALSE	FALSE	FALSE
BA2	E92	35	final	HI.4803.001.N706---N502.E92_P35	E92	FALSE	TRUE	FALSE	FALSE	FALSE
BA2	E93	1	initial	HI.4802.001.N712---N502.E93_P1	clone	FALSE	TRUE	FALSE	FALSE	FALSE
BA2	E93	35	final	HI.4803.001.N712---N506.E93_P35	E93	FALSE	TRUE	FALSE	FALSE	FALSE
BSc1	C1	1	initial	NS.1249.002.N702---N504.C1_P1	clone	TRUE	TRUE	FALSE	FALSE
BSc1	C1	35	final	NS.1250.002.N710---N504.C1_P35	C1	TRUE	TRUE	FALSE	FALSE
BSc1	C2	1	initial	NS.1249.002.N704---N508.C2_P1	C2_P1	FALSE	FALSE	TRUE	FALSE
BSc1	C2	35	final	NS.1250.001.N702---N517.C2_P35	C2_P35	FALSE	FALSE	TRUE	FALSE
BSc1	C3	1	initial	HI.4802.002.N706---N506.C3_P1	clone	TRUE	TRUE	FALSE	FALSE
BSc1	C3	35	final	HI.4803.001.N711---N507.C3_P35	C3	TRUE	TRUE	FALSE	FALSE
BSc1	C5	1	initial	HI.4802.003.N704---N508.C5_P1	clone	TRUE	TRUE	FALSE	FALSE
BSc1	C5	35	final	HI.4803.001.N708---N517.C5_P35	C5	TRUE	TRUE	FALSE	FALSE
BSc1	C12	1	initial	HI.4802.002.N708---N505.C12_P1	clone	FALSE	TRUE	FALSE	FALSE
BSc1	C12	35	final	HI.4803.001.N712---N505.C12_P35	C12	FALSE	TRUE	FALSE	FALSE
BSc1	C13	1	initial	HI.4802.003.N705---N506.C13_P1	clone	TRUE	TRUE	FALSE	FALSE
BSc1	C13	35	final	HI.4803.003.N710---N502.C13_P35	C13	TRUE	TRUE	FALSE	FALSE
BSc1	C14	1	initial	HI.4802.003.N706---N517.C14_P1	clone	FALSE	FALSE	TRUE	FALSE
BSc1	C14	35	final	HI.4803.003.N701---N517.C14_P35	C14	FALSE	FALSE	TRUE	FALSE
BSc1	C15	1	initial	HI.4802.001.N711---N508.C15_P1	C15	FALSE	FALSE	TRUE	FALSE
BSc1	C20	1	initial	HI.4802.002.N711---N507.C20_P1	clone	FALSE	TRUE	FALSE	FALSE
BSc1	C20	35	final	HI.4803.003.N705---N508.C20_P35	C20	FALSE	TRUE	FALSE	FALSE
BSc1	C21	1	initial	HI.4802.001.N701---N504.C21_P1	clone	TRUE	TRUE	FALSE	FALSE
BSc1	C21	35	final	HI.4803.002.N705---N517.C21_P35	C21	TRUE	TRUE	FALSE	FALSE
BSc1	C23	1	initial	HI.4802.003.N711---N504.C23_P1	clone	TRUE	TRUE	FALSE	FALSE
BSc1	C23	35	final	HI.4803.001.N710---N504.C23_P35	C23	TRUE	TRUE	FALSE	FALSE
BSc1	C25	1	initial	HI.4802.003.N701---N505.C25_P1	clone	TRUE	TRUE	FALSE	FALSE
BSc1	C25	35	final	HI.4802.003.N712---N505.C25_P35	C25	TRUE	TRUE	FALSE	FALSE
BSc1	C26	1	initial	HI.4802.001.N711---N507.C26_P1	clone	FALSE	FALSE	TRUE	FALSE
BSc1	C26	35	final	HI.4803.002.N710---N504.C26_P35	C26	FALSE	FALSE	TRUE	FALSE
BSc1	C31	1	initial	HI.4802.002.N703---N507.C31_P1	clone	FALSE	FALSE	TRUE	FALSE
BSc1	C31	35	final	HI.4803.001.N706---N507.C31_P35	C31	FALSE	FALSE	TRUE	FALSE
BSc1	C32	1	initial	HI.4802.003.N705---N504.C32_P1	clone	FALSE	FALSE	TRUE	FALSE
BSc1	C32	35	final	HI.4803.002.N703---N505.C32_P35	C32	FALSE	FALSE	TRUE	FALSE
BSc1	C37	1	initial	HI.4802.001.N708---N517.C37_P1	clone	TRUE	TRUE	FALSE	FALSE
BSc1	C37	35	final	HI.4803.002.N704---N504.C37_P35	C37	TRUE	TRUE	FALSE	FALSE
BSc1	C44	1	initial	HI.4802.003.N701---N508.C44_P1	clone	TRUE	TRUE	FALSE	FALSE
BSc1	C44	35	final	HI.4803.001.N705---N503.C44_P35	C44	TRUE	TRUE	FALSE	FALSE
BSc1	C46	1	initial	HI.4802.002.N707---N502.C46_P1	C46	TRUE	FALSE	TRUE	FALSE
BSc1	C46	35	final	HI.4803.003.N711---N505.C46_P35	clone	TRUE	FALSE	TRUE	FALSE
BSc1	C49	1	initial	HI.4802.002.N705---N505.C49_P1	clone	TRUE	TRUE	FALSE	FALSE
BSc1	C49	35	final	HI.4803.001.N703---N504.C49_P35	C49	TRUE	TRUE	FALSE	FALSE
BSc1	C53	1	initial	HI.4802.003.N710---N503.C53_P1	C53_P1	FALSE	FALSE	TRUE	FALSE
BSc1	C53	35	final	HI.4803.002.N709---N517.C53_P35	C53_P35	TRUE	FALSE	FALSE	TRUE
BSc1	C57	1	initial	HI.4802.002.N710---N517.C57_P1	clone	TRUE	TRUE	FALSE	FALSE
BSc1	C57	35	final	HI.4803.001.N707---N517.C57_P35	C57	TRUE	TRUE	FALSE	FALSE
BSc1	C59	1	initial	HI.4802.001.N708---N503.C59_P1	clone	TRUE	TRUE	FALSE	FALSE
BSc1	C59	35	final	HI.4803.003.N702---N504.C59_P35	C59	TRUE	TRUE	FALSE	FALSE
BSc1	C62	1	initial	HI.4802.003.N709---N517.C62_P1	C62_P1	TRUE	TRUE	FALSE	FALSE
BSc1	C62	35	final	HI.4803.002.N711---N517.C62_P35	C62_P35	FALSE	TRUE	TRUE	TRUE
BSc1	C65	1	initial	HI.4802.002.N704---N502.C65_P1	clone	TRUE	TRUE	FALSE	FALSE
BSc1	C65	35	final	HI.4803.003.N702---N508.C65_P35	C65	TRUE	TRUE	FALSE	FALSE
BSc1	C68	1	initial	HI.4802.001.N701---N502.C68_P1	clone	FALSE	FALSE	TRUE	FALSE
BSc1	C68	35	final	HI.4803.002.N709---N502.C68_P35	C68	FALSE	FALSE	TRUE	FALSE
BSc1	C70	1	initial	HI.4802.003.N708---N507.C70_P1	clone	TRUE	TRUE	FALSE	FALSE
BSc1	C70	35	final	HI.4803.002.N712---N517.C70_P35	C70	TRUE	TRUE	FALSE	FALSE
BSc1	C71	1	initial	HI.4802.001.N706---N517.C71_P1	clone	FALSE	FALSE	TRUE	FALSE
BSc1	C71	35	final	HI.4803.002.N706---N502.C71_P35	C71	FALSE	FALSE	TRUE	FALSE
BSc1	C72	1	initial	HI.4802.002.N707---N504.C72_P1	clone	TRUE	TRUE	FALSE	FALSE
BSc1	C72	35	final	HI.4802.003.N712---N506.C72_P35	C72	TRUE	TRUE	FALSE	FALSE
BSc1	C73	1	initial	HI.4802.003.N710---N508.C73_P1	clone	TRUE	TRUE	FALSE	FALSE
BSc1	C73	35	final	HI.4803.001.N711---N517.C73_P35	C73	TRUE	TRUE	FALSE	FALSE
BSc1	C74	1	initial	HI.4802.003.N708---N503.C74_P1	clone	FALSE	FALSE	TRUE	FALSE
BSc1	C74	35	final	HI.4803.002.N711---N503.C74_P35	C74	FALSE	FALSE	TRUE	FALSE
BSc1	C77	1	initial	HI.4802.001.N706---N504.C77_P1	clone	TRUE	TRUE	FALSE	FALSE
BSc1	C77	35	final	HI.4803.002.N711---N504.C77_P35	C77	TRUE	TRUE	FALSE	FALSE
BSc1	C78	1	initial	HI.4802.002.N701---N506.C78_P1	clone	FALSE	FALSE	TRUE	FALSE
BSc1	C78	35	final	HI.4803.003.N706---N508.C78_P35	C78	FALSE	FALSE	TRUE	FALSE
BSc1	C82	1	initial	HI.4802.001.N702---N508.C82_P1	clone	TRUE	TRUE	FALSE	FALSE
BSc1	C82	35	final	HI.4803.003.N710---N506.C82_P35	C82	TRUE	TRUE	FALSE	FALSE
BSc1	C83	1	initial	HI.4802.002.N710---N506.C83_P1	clone	FALSE	FALSE	TRUE	FALSE
BSc1	C83	35	final	HI.4803.002.N708---N502.C83_P35	C83	FALSE	FALSE	TRUE	FALSE
BSc1	C84	1	initial	HI.4802.003.N711---N507.C84_P1	clone	TRUE	TRUE	FALSE	FALSE
BSc1	C84	35	final	HI.4803.001.N705---N517.C84_P35	C84	TRUE	TRUE	FALSE	FALSE
BSc1	C87	1	initial	HI.4802.001.N703---N503.C87_P1	C87	TRUE	TRUE	FALSE	FALSE
BSc1	C87	35	final	HI.4803.003.N707---N502.C87_P35	clone	TRUE	FALSE	TRUE	FALSE
BSc1	C96	1	initial	HI.4802.003.N710---N507.C96_P1	clone	TRUE	TRUE	FALSE	FALSE
BSc1	C96	35	final	HI.4803.002.N707---N507.C96_P35	C96	TRUE	TRUE	FALSE	FALSE
BSc2	F1	1	initial	HI.4802.001.N712---N506.F1_P1	clone	FALSE	TRUE	FALSE	FALSE
BSc2	F1	35	final	HI.4803.002.N709---N507.F1_P35	F1	FALSE	TRUE	FALSE	FALSE
BSc2	F2	1	initial	NS.1249.001.N705---N503.F2_P1	clone	TRUE	TRUE	FALSE	FALSE
BSc2	F2	35	final	NS.1250.002.N711---N507.F2_P35	F2	TRUE	TRUE	FALSE	FALSE
BSc2	F3	1	initial	HI.4802.002.N702---N508.F3_P1	F3	TRUE	FALSE	TRUE	FALSE
BSc2	F3	35	final	HI.4803.003.N705---N505.F3_P35	clone	TRUE	FALSE	TRUE	FALSE
BSc2	F4	1	initial	HI.4802.001.N707---N505.F4_P1	F4	FALSE	FALSE	TRUE	FALSE
BSc2	F7	1	initial	HI.4802.001.N706---N506.F7_P1	F7	FALSE	FALSE	TRUE	FALSE
BSc2	F8	1	initial	HI.4802.002.N705---N508.F8_P1	clone	FALSE	FALSE	TRUE	FALSE
BSc2	F8	35	final	HI.4803.002.N703---N503.F8_P35	F8	FALSE	FALSE	TRUE	FALSE
BSc2	F11	1	initial	HI.4802.002.N709---N502.F11_P1	clone	FALSE	TRUE	FALSE	FALSE
BSc2	F11	35	final	HI.4803.002.N701---N506.F11_P35	F11	FALSE	TRUE	FALSE	FALSE
BSc2	F12	1	initial	HI.4802.002.N704---N506.F12_P1	clone	FALSE	FALSE	TRUE	FALSE
BSc2	F12	35	final	HI.4803.003.N708---N517.F12_P35	F12	FALSE	FALSE	TRUE	FALSE
BSc2	F13	1	initial	HI.4802.003.N704---N507.F13_P1	clone	TRUE	TRUE	FALSE	FALSE
BSc2	F13	35	final	HI.4803.003.N702---N505.F13_P35	F13	TRUE	TRUE	FALSE	FALSE
BSc2	F15	1	initial	HI.4802.001.N707---N508.F15_P1	F15	TRUE	TRUE	FALSE	FALSE
BSc2	F15	35	final	HI.4803.001.N710---N503.F15_P35	clone	TRUE	FALSE	TRUE	FALSE
BSc2	F18	1	initial	NS.1249.001.N706---N517.F18_P1	clone	FALSE	TRUE	FALSE	FALSE
BSc2	F18	35	final	NS.1250.002.N711---N503.F18_P35	F18	FALSE	TRUE	FALSE	FALSE
BSc2	F20	1	initial	HI.4802.002.N711---N506.F20_P1	clone	FALSE	FALSE	TRUE	FALSE
BSc2	F20	35	final	HI.4803.003.N701---N504.F20_P35	F20	FALSE	FALSE	TRUE	FALSE
BSc2	F21	1	initial	HI.4802.001.N702---N502.F21_P1	F21_P1	TRUE	FALSE	TRUE	FALSE
BSc2	F21	35	final	HI.4803.003.N705---N517.F21_P35	F21_P35	FALSE	FALSE	TRUE	FALSE
BSc2	F23	1	initial	HI.4802.001.N706---N503.F23_P1	clone	FALSE	TRUE	FALSE	FALSE
BSc2	F23	35	final	HI.4803.002.N708---N508.F23_P35	F23	FALSE	TRUE	FALSE	FALSE
BSc2	F25	1	initial	HI.4802.003.N704---N502.F25_P1	clone	TRUE	TRUE	FALSE	FALSE
BSc2	F25	35	final	HI.4803.002.N701---N508.F25_P35	F25	TRUE	TRUE	FALSE	FALSE
BSc2	F27	1	initial	HI.4802.002.N708---N503.F27_P1	F27	FALSE	FALSE	TRUE	FALSE
BSc2	F31	1	initial	HI.4802.003.N706---N506.F31_P1	clone	FALSE	FALSE	TRUE	FALSE
BSc2	F31	35	final	HI.4803.003.N706---N503.F31_P35	F31	FALSE	FALSE	TRUE	FALSE
BSc2	F34	1	initial	HI.4802.001.N707---N503.F34_P1	clone	FALSE	TRUE	TRUE	TRUE
BSc2	F34	35	final	HI.4803.002.N705---N508.F34_P35	F34	FALSE	TRUE	FALSE	FALSE
BSc2	F38	1	initial	HI.4802.002.N702---N505.F38_P1	clone	TRUE	TRUE	FALSE	FALSE
BSc2	F38	16		NS.1250.001.N701---N517.F38_P16	clone	TRUE		FALSE
BSc2	F38	25		HI.4803.003.N703---N508.F38_P25	F38	TRUE		FALSE
BSc2	F39	1	initial	HI.4802.002.N703---N508.F39_P1	clone	TRUE	TRUE	FALSE	FALSE
BSc2	F39	35	final	HI.4803.002.N706---N505.F39_P35	F39	TRUE	TRUE	FALSE	FALSE
BSc2	F43	1	initial	NS.1249.002.N708---N502.F43_P1	clone	FALSE	FALSE	TRUE	FALSE
BSc2	F43	16		NS.1249.002.N712---N506.F43_P16	clone	FALSE		TRUE
BSc2	F43	35	final	NS.1250.001.N711---N503.F43_P35	F43	FALSE	FALSE	TRUE	FALSE
BSc2	F48	1	initial	HI.4802.002.N712---N506.F48_P1	F48_P1	FALSE	FALSE	TRUE	FALSE
BSc2	F48	35	final	HI.4803.002.N709---N508.F48_P35	F48_P35	FALSE	FALSE	TRUE	FALSE
BSc2	F49	1	initial	HI.4802.003.N705---N507.F49_P1	clone	FALSE	TRUE	FALSE	FALSE
BSc2	F49	35	final	HI.4803.002.N702---N508.F49_P35	F49	FALSE	TRUE	FALSE	FALSE
BSc2	F50	1	initial	HI.4802.001.N702---N503.F50_P1	clone	FALSE	TRUE	FALSE	FALSE
BSc2	F50	35	final	HI.4803.001.N710---N517.F50_P35	F50	FALSE	TRUE	FALSE	FALSE
BSc2	F52	1	initial	HI.4802.002.N710---N502.F52_P1	clone	FALSE	TRUE	FALSE	FALSE
BSc2	F52	35	final	HI.4803.003.N709---N508.F52_P35	F52	FALSE	TRUE	FALSE	FALSE
BSc2	F53	1	initial	HI.4802.002.N708---N504.F53_P1	clone	TRUE	TRUE	FALSE	FALSE
BSc2	F53	35	final	HI.4803.002.N710---N508.F53_P35	F53	TRUE	TRUE	FALSE	FALSE
BSc2	F56	1	initial	HI.4802.002.N706---N503.F56_P1	clone	TRUE	TRUE	FALSE	FALSE
BSc2	F56	35	final	HI.4803.003.N706---N506.F56_P35	F56	TRUE	TRUE	FALSE	FALSE
BSc2	F57	1	initial	NS.1249.001.N703---N502.F57_P1	clone	TRUE	TRUE	FALSE	FALSE
BSc2	F57	10		NS.1249.002.N712---N505.F57_P10	clone	TRUE		FALSE
BSc2	F57	35	final	NS.1250.002.N709---N508.F57_P35	F57	TRUE	TRUE	FALSE	FALSE
BSc2	F58	1	initial	HI.4802.002.N709---N504.F58_P1	F58_P1	TRUE	FALSE	TRUE	FALSE
BSc2	F58	35	final	HI.4803.002.N701---N505.F58_P35	F58_P35	FALSE	FALSE	TRUE	FALSE
BSc2	F59	1	initial	HI.4802.001.N711---N503.F59_P1	clone	TRUE	TRUE	FALSE	FALSE
BSc2	F59	35	final	HI.4803.002.N704---N507.F59_P35	F59	TRUE	TRUE	FALSE	FALSE
BSc2	F61	1	initial	NS.1249.002.N705---N507.F61_P1	clone	FALSE	TRUE	FALSE	FALSE
BSc2	F61	35	final	NS.1250.002.N710---N503.F61_P35	F61	FALSE	TRUE	FALSE	FALSE
BSc2	F62	1	initial	HI.4802.002.N709---N506.F62_P1	clone	FALSE	FALSE	TRUE	FALSE
BSc2	F62	35	final	HI.4803.001.N704---N506.F62_P35	F62	FALSE	FALSE	TRUE	FALSE
BSc2	F65	1	initial	HI.4802.003.N701---N517.F65_P1	clone	FALSE	FALSE	TRUE	FALSE
BSc2	F65	35	final	HI.4803.001.N704---N517.F65_P35	F65	FALSE	FALSE	TRUE	FALSE
BSc2	F72	1	initial	HI.4802.003.N707---N506.F72_P1	clone	FALSE	TRUE	FALSE	FALSE
BSc2	F72	35	final	HI.4803.002.N709---N505.F72_P35	F72	FALSE	TRUE	FALSE	FALSE
BSc2	F76	1	initial	HI.4802.001.N709---N506.F76_P1	F76_P1	FALSE	TRUE	FALSE	FALSE
BSc2	F76	35	final	HI.4803.002.N710---N503.F76_P35	F76_P35	TRUE	FALSE	TRUE	FALSE
BSc2	F79	1	initial	HI.4802.003.N702---N517.F79_P1	clone	FALSE	FALSE	TRUE	FALSE
BSc2	F79	35	final	HI.4803.002.N711---N507.F79_P35	F79	FALSE	FALSE	TRUE	FALSE
BSc2	F86	1	initial	NS.1249.002.N702---N505.F86_P1	clone	FALSE	TRUE	FALSE	FALSE
BSc2	F86	35	final	NS.1250.002.N703---N502.F86_P35	F86	FALSE	TRUE	FALSE	FALSE
BSc2	F87	1	initial	HI.4802.003.N709---N508.F87_P1	clone	FALSE	TRUE	FALSE	FALSE
BSc2	F87	25		HI.4803.003.N702---N507.F87_P25	F87	FALSE		FALSE
BSc2	F88	1	initial	HI.4802.002.N706---N504.F88_P1	clone	FALSE	FALSE	TRUE	FALSE
BSc2	F88	35	final	HI.4803.001.N711---N508.F88_P35	F88	FALSE	FALSE	TRUE	FALSE
BSc2	F92	1	initial	NS.1249.001.N709---N507.F92_P1	clone	FALSE	FALSE	TRUE	FALSE
BSc2	F92	35	final	NS.1250.002.N701---N502.F92_P35	F92	FALSE	FALSE	TRUE	FALSE
